# Supplementary material
Source: publisher figshare collection journal article supplement (https://acs.figshare.com/ndownloader/files/4391137)
Supplement: Supplementary file 1 [file 4391137]

  
data_2a
_publ_requested_journal          Organometallics
_publ_contact_author_name        Puddephatt
_publ_contact_author_address     'University of Western Ontario'
_publ_contact_author_email       pudd@uwo.ca
_publ_contact_author_phone       519-661-2111
_publ_contact_author_fax         519-661-3022
loop_
_publ_author_name
_publ_author_address
'Puddephatt, R.J.' 'University of Western Ontario'

_audit_creation_method           SHELXL-97
_chemical_name_systematic        
; 
 ? 
;
_chemical_name_common            ?
_chemical_melting_point          ?
_chemical_formula_moiety         'C22 H21 N Pt S'
_chemical_formula_sum            'C22 H21 N Pt S'
_chemical_formula_weight         526.55

loop_
_atom_type_symbol
_atom_type_description
_atom_type_scat_dispersion_real
_atom_type_scat_dispersion_imag
_atom_type_scat_source
C C 0.0033 0.0016 'International Tables Vol C Tables 4.2.6.8 and 6.1.1.4'
H H 0.0000 0.0000 'International Tables Vol C Tables 4.2.6.8 and 6.1.1.4'
N N 0.0061 0.0033 'International Tables Vol C Tables 4.2.6.8 and 6.1.1.4'
Pt Pt -1.7033 8.3905 'International Tables Vol C Tables 4.2.6.8 and 6.1.1.4'
S S 0.1246 0.1234 'International Tables Vol C Tables 4.2.6.8 and 6.1.1.4'

_symmetry_cell_setting           Triclinic
_symmetry_space_group_name_H-M   P-1
_symmetry_space_group_name_Hall  -P1

loop_
_symmetry_equiv_pos_as_xyz
'x, y, z'
'-x, -y, -z'

_cell_length_a                   8.7046(17)
_cell_length_b                   10.154(2)
_cell_length_c                   11.044(2)
_cell_angle_alpha                69.73(3)
_cell_angle_beta                 80.06(3)
_cell_angle_gamma                88.40(3)
_cell_volume                     901.4(3)
_cell_formula_units_Z            2
_cell_measurement_temperature    423(2)
_cell_measurement_reflns_used    ?
_cell_measurement_theta_min      2.04
_cell_measurement_theta_max      27.48

_exptl_crystal_description       'hexagonal block'
_exptl_crystal_colour            green
_exptl_crystal_size_max          0.18
_exptl_crystal_size_mid          0.17
_exptl_crystal_size_min          0.13
_exptl_crystal_density_meas      ?
_exptl_crystal_density_diffrn    1.940
_exptl_crystal_density_method    'not measured'
_exptl_crystal_F_000             508
_exptl_absorpt_coefficient_mu    7.903
_exptl_absorpt_correction_type   multi-scan
_exptl_absorpt_correction_T_min  0.3304
_exptl_absorpt_correction_T_max  0.4265
_exptl_absorpt_process_details   'DENZO-SMN (Otwinowski & Minor, 1997)'

_exptl_special_details           
; 
 ? 
;

_diffrn_ambient_temperature      423(2)
_diffrn_radiation_wavelength     0.71073
_diffrn_radiation_type           MoK\a
_diffrn_radiation_source         'fine-focus sealed tube'
_diffrn_radiation_monochromator  graphite
_diffrn_measurement_device_type  'Nonius Kappa-CCD'
_diffrn_measurement_method       '\f scans, and \w scans with \k offsets'
_diffrn_detector_area_resol_mean ?
_diffrn_standards_number         0
_diffrn_standards_interval_count ?
_diffrn_standards_interval_time  ?
_diffrn_standards_decay_%        ?
_diffrn_reflns_number            7659
_diffrn_reflns_av_R_equivalents  0.0494
_diffrn_reflns_av_sigmaI/netI    0.0695
_diffrn_reflns_limit_h_min       -11
_diffrn_reflns_limit_h_max       11
_diffrn_reflns_limit_k_min       -13
_diffrn_reflns_limit_k_max       13
_diffrn_reflns_limit_l_min       -14
_diffrn_reflns_limit_l_max       14
_diffrn_reflns_theta_min         2.00
_diffrn_reflns_theta_max         27.61
_reflns_number_total             4135
_reflns_number_gt                3438
_reflns_threshold_expression     >2sigma(I)

_computing_data_collection       'COLLECT (Nonius, 1997-2001)'
_computing_cell_refinement       'DENZO-SMN (Otwinowski & Minor, 1997)'
_computing_data_reduction        DENZO-SMN
_computing_structure_solution    'SHELXS-97 (Sheldrick, 1990)'
_computing_structure_refinement  'SHELXL-97 (Sheldrick, 1997)'
_computing_molecular_graphics    'SHELXTL/PC (Sheldrick, 2001)'
_computing_publication_material  SHELXTL/PC

_refine_special_details          
; 
 Refinement of F^2^ against ALL reflections.  The weighted R-factor wR and 
 goodness of fit S are based on F^2^, conventional R-factors R are based 
 on F, with F set to zero for negative F^2^. The threshold expression of 
 F^2^ > 2sigma(F^2^) is used only for calculating R-factors(gt) etc. and is 
 not relevant to the choice of reflections for refinement.  R-factors based 
 on F^2^ are statistically about twice as large as those based on F, and R- 
 factors based on ALL data will be even larger. 
;

_refine_ls_structure_factor_coef Fsqd
_refine_ls_matrix_type           full
_refine_ls_weighting_scheme      calc
_refine_ls_weighting_details     
'calc w=1/[\s^2^(Fo^2^)+(0.0967P)^2^+0.0000P] where P=(Fo^2^+2Fc^2^)/3'
_atom_sites_solution_primary     direct
_atom_sites_solution_secondary   difmap
_atom_sites_solution_hydrogens   geom
_refine_ls_hydrogen_treatment    constr
_refine_ls_extinction_method     none
_refine_ls_extinction_coef       ?
_refine_ls_number_reflns         4135
_refine_ls_number_parameters     226
_refine_ls_number_restraints     0
_refine_ls_R_factor_all          0.0682
_refine_ls_R_factor_gt           0.0512
_refine_ls_wR_factor_ref         0.1516
_refine_ls_wR_factor_gt          0.1239
_refine_ls_goodness_of_fit_ref   1.077
_refine_ls_restrained_S_all      1.077
_refine_ls_shift/su_max          0.000
_refine_ls_shift/su_mean         0.000

loop_
_atom_site_label
_atom_site_type_symbol
_atom_site_fract_x
_atom_site_fract_y
_atom_site_fract_z
_atom_site_U_iso_or_equiv
_atom_site_adp_type
_atom_site_occupancy
_atom_site_symmetry_multiplicity
_atom_site_calc_flag
_atom_site_refinement_flags
_atom_site_disorder_assembly
_atom_site_disorder_group
Pt1 Pt 0.12539(4) 0.71406(3) 0.29264(3) 0.02299(15) Uani 1 1 d . . .
S1 S 0.2941(3) 0.7539(2) 0.4230(2) 0.0260(5) Uani 1 1 d . . .
C10 C -0.0278(10) 0.6975(10) 0.1763(9) 0.0233(19) Uani 1 1 d . . .
C2 C 0.2997(14) 0.5984(11) 0.5628(11) 0.043(3) Uani 1 1 d . . .
H2A H 0.3685 0.6149 0.6157 0.064 Uiso 1 1 calc R . .
H2B H 0.3370 0.5224 0.5341 0.064 Uiso 1 1 calc R . .
H2C H 0.1967 0.5745 0.6136 0.064 Uiso 1 1 calc R . .
C1 C 0.4917(12) 0.7644(12) 0.3356(11) 0.041(3) Uani 1 1 d . . .
H1A H 0.5629 0.7806 0.3867 0.061 Uiso 1 1 calc R . .
H1B H 0.5021 0.8403 0.2531 0.061 Uiso 1 1 calc R . .
H1C H 0.5149 0.6778 0.3206 0.061 Uiso 1 1 calc R . .
C3 C 0.2226(10) 0.5276(9) 0.3016(9) 0.0225(18) Uani 1 1 d . . .
C4 C 0.3468(11) 0.5200(9) 0.2059(9) 0.0252(19) Uani 1 1 d . . .
H4A H 0.3810 0.6004 0.1343 0.030 Uiso 1 1 calc R . .
C5 C 0.4216(11) 0.3913(10) 0.2163(9) 0.028(2) Uani 1 1 d . . .
H5A H 0.5070 0.3897 0.1533 0.033 Uiso 1 1 calc R . .
C6 C 0.3694(11) 0.2674(10) 0.3191(10) 0.028(2) Uani 1 1 d . . .
C7 C 0.2432(10) 0.2759(10) 0.4127(10) 0.027(2) Uani 1 1 d . . .
H7A H 0.2062 0.1953 0.4830 0.032 Uiso 1 1 calc R . .
C8 C 0.1703(10) 0.4048(9) 0.4026(10) 0.027(2) Uani 1 1 d . . .
H8A H 0.0850 0.4066 0.4656 0.032 Uiso 1 1 calc R . .
C13 C -0.2477(12) 0.7255(11) 0.0091(10) 0.035(2) Uani 1 1 d . . .
H13A H -0.3188 0.7333 -0.0468 0.042 Uiso 1 1 calc R . .
C21 C -0.0331(12) 1.1374(11) 0.2754(11) 0.034(2) Uani 1 1 d . . .
H21A H -0.0142 1.2053 0.3105 0.041 Uiso 1 1 calc R . .
C19 C -0.2966(11) 0.9687(12) 0.0072(9) 0.034(2) Uani 1 1 d . . .
H19A H -0.3653 0.9811 -0.0514 0.041 Uiso 1 1 calc R . .
C14 C -0.2205(11) 0.8368(10) 0.0501(9) 0.028(2) Uani 1 1 d . . .
C9 C 0.4495(12) 0.1315(10) 0.3312(11) 0.035(2) Uani 1 1 d . . .
H9A H 0.5329 0.1461 0.2581 0.053 Uiso 1 1 calc R . .
H9B H 0.3758 0.0625 0.3320 0.053 Uiso 1 1 calc R . .
H9C H 0.4910 0.0991 0.4112 0.053 Uiso 1 1 calc R . .
C18 C -0.2720(11) 1.0723(10) 0.0484(9) 0.031(2) Uani 1 1 d . . .
H18A H -0.3230 1.1560 0.0181 0.038 Uiso 1 1 calc R . .
C12 C -0.1676(12) 0.6037(12) 0.0525(10) 0.037(2) Uani 1 1 d . . .
H12A H -0.1869 0.5287 0.0265 0.044 Uiso 1 1 calc R . .
C20 C -0.1355(11) 1.1632(11) 0.1883(11) 0.034(2) Uani 1 1 d . . .
H20A H -0.1829 1.2493 0.1621 0.041 Uiso 1 1 calc R . .
C16 C -0.0881(10) 0.9340(10) 0.1806(8) 0.0252(19) Uani 1 1 d . . .
C11 C -0.0581(11) 0.5902(10) 0.1346(10) 0.030(2) Uani 1 1 d . . .
H11A H -0.0051 0.5071 0.1614 0.036 Uiso 1 1 calc R . .
C15 C -0.1133(10) 0.8225(10) 0.1345(9) 0.0261(19) Uani 1 1 d . . .
C22 C 0.0411(11) 1.0124(10) 0.3107(10) 0.029(2) Uani 1 1 d . . .
H22A H 0.1110 0.9974 0.3686 0.035 Uiso 1 1 calc R . .
C17 C -0.1679(11) 1.0580(10) 0.1392(10) 0.030(2) Uani 1 1 d . . .
N1 N 0.0154(9) 0.9113(8) 0.2638(8) 0.0236(16) Uani 1 1 d . . .

loop_
_atom_site_aniso_label
_atom_site_aniso_U_11
_atom_site_aniso_U_22
_atom_site_aniso_U_33
_atom_site_aniso_U_23
_atom_site_aniso_U_13
_atom_site_aniso_U_12
Pt1 0.0216(2) 0.0227(2) 0.0233(2) -0.00605(14) -0.00497(14) 0.00392(14)
S1 0.0263(12) 0.0250(12) 0.0270(11) -0.0080(9) -0.0084(9) 0.0028(9)
C10 0.012(4) 0.036(5) 0.020(4) -0.005(4) -0.007(3) 0.001(4)
C2 0.047(7) 0.032(6) 0.042(6) 0.000(5) -0.013(5) -0.008(5)
C1 0.032(6) 0.041(6) 0.046(6) -0.012(5) -0.004(5) -0.003(5)
C3 0.021(4) 0.018(4) 0.029(5) -0.009(4) -0.008(4) 0.011(3)
C4 0.033(5) 0.020(4) 0.020(4) -0.004(3) -0.004(4) 0.006(4)
C5 0.026(5) 0.034(5) 0.022(4) -0.011(4) -0.004(4) 0.005(4)
C6 0.029(5) 0.023(5) 0.039(5) -0.012(4) -0.020(4) 0.003(4)
C7 0.015(4) 0.029(5) 0.034(5) -0.008(4) -0.006(4) -0.002(4)
C8 0.023(5) 0.021(4) 0.035(5) -0.010(4) -0.004(4) 0.005(4)
C13 0.032(5) 0.043(6) 0.027(5) -0.010(4) -0.008(4) 0.003(5)
C21 0.032(5) 0.030(5) 0.044(6) -0.016(5) -0.009(5) 0.001(4)
C19 0.021(5) 0.055(7) 0.025(5) -0.007(5) -0.013(4) 0.012(4)
C14 0.026(5) 0.030(5) 0.022(4) -0.006(4) 0.000(4) -0.003(4)
C9 0.040(6) 0.023(5) 0.044(6) -0.011(4) -0.011(5) 0.007(4)
C18 0.026(5) 0.027(5) 0.031(5) 0.003(4) -0.007(4) 0.009(4)
C12 0.031(5) 0.046(6) 0.034(5) -0.016(5) -0.003(4) -0.010(5)
C20 0.022(5) 0.027(5) 0.044(6) -0.007(4) 0.003(4) 0.001(4)
C16 0.022(5) 0.026(5) 0.020(4) 0.001(4) -0.002(4) -0.002(4)
C11 0.029(5) 0.027(5) 0.034(5) -0.009(4) -0.005(4) 0.005(4)
C15 0.023(5) 0.032(5) 0.017(4) -0.003(4) 0.002(3) -0.003(4)
C22 0.023(5) 0.026(5) 0.037(5) -0.011(4) -0.005(4) 0.004(4)
C17 0.020(5) 0.028(5) 0.034(5) -0.003(4) 0.003(4) 0.005(4)
N1 0.023(4) 0.017(3) 0.030(4) -0.007(3) -0.005(3) 0.008(3)

_geom_special_details            
; 
 All esds (except the esd in the dihedral angle between two l.s. planes) 
 are estimated using the full covariance matrix.  The cell esds are taken 
 into account individually in the estimation of esds in distances, angles 
 and torsion angles; correlations between esds in cell parameters are only 
 used when they are defined by crystal symmetry.  An approximate (isotropic) 
 treatment of cell esds is used for estimating esds involving l.s. planes. 
;

loop_
_geom_bond_atom_site_label_1
_geom_bond_atom_site_label_2
_geom_bond_distance
_geom_bond_site_symmetry_2
_geom_bond_publ_flag
Pt1 C3 2.030(8) . ?
Pt1 C10 2.052(8) . ?
Pt1 N1 2.142(7) . ?
Pt1 S1 2.358(2) . ?
S1 C2 1.792(11) . ?
S1 C1 1.808(11) . ?
C10 C11 1.369(13) . ?
C10 C15 1.428(13) . ?
C2 H2A 0.9600 . ?
C2 H2B 0.9600 . ?
C2 H2C 0.9600 . ?
C1 H1A 0.9600 . ?
C1 H1B 0.9600 . ?
C1 H1C 0.9600 . ?
C3 C8 1.378(13) . ?
C3 C4 1.396(12) . ?
C4 C5 1.422(12) . ?
C4 H4A 0.9300 . ?
C5 C6 1.393(13) . ?
C5 H5A 0.9300 . ?
C6 C7 1.395(14) . ?
C6 C9 1.503(13) . ?
C7 C8 1.416(13) . ?
C7 H7A 0.9300 . ?
C8 H8A 0.9300 . ?
C13 C12 1.379(15) . ?
C13 C14 1.395(14) . ?
C13 H13A 0.9300 . ?
C21 C22 1.371(13) . ?
C21 C20 1.377(15) . ?
C21 H21A 0.9300 . ?
C19 C18 1.318(15) . ?
C19 C14 1.442(14) . ?
C19 H19A 0.9300 . ?
C14 C15 1.400(13) . ?
C9 H9A 0.9600 . ?
C9 H9B 0.9600 . ?
C9 H9C 0.9600 . ?
C18 C17 1.433(14) . ?
C18 H18A 0.9300 . ?
C12 C11 1.398(14) . ?
C12 H12A 0.9300 . ?
C20 C17 1.409(14) . ?
C20 H20A 0.9300 . ?
C16 N1 1.355(12) . ?
C16 C17 1.392(13) . ?
C16 C15 1.429(13) . ?
C11 H11A 0.9300 . ?
C22 N1 1.339(12) . ?
C22 H22A 0.9300 . ?

loop_
_geom_angle_atom_site_label_1
_geom_angle_atom_site_label_2
_geom_angle_atom_site_label_3
_geom_angle
_geom_angle_site_symmetry_1
_geom_angle_site_symmetry_3
_geom_angle_publ_flag
C3 Pt1 C10 93.4(4) . . ?
C3 Pt1 N1 173.8(3) . . ?
C10 Pt1 N1 80.9(3) . . ?
C3 Pt1 S1 91.7(3) . . ?
C10 Pt1 S1 174.9(3) . . ?
N1 Pt1 S1 93.9(2) . . ?
C2 S1 C1 100.9(5) . . ?
C2 S1 Pt1 109.7(4) . . ?
C1 S1 Pt1 107.8(4) . . ?
C11 C10 C15 117.8(8) . . ?
C11 C10 Pt1 131.0(7) . . ?
C15 C10 Pt1 111.2(7) . . ?
S1 C2 H2A 109.5 . . ?
S1 C2 H2B 109.5 . . ?
H2A C2 H2B 109.5 . . ?
S1 C2 H2C 109.5 . . ?
H2A C2 H2C 109.5 . . ?
H2B C2 H2C 109.5 . . ?
S1 C1 H1A 109.5 . . ?
S1 C1 H1B 109.5 . . ?
H1A C1 H1B 109.5 . . ?
S1 C1 H1C 109.5 . . ?
H1A C1 H1C 109.5 . . ?
H1B C1 H1C 109.5 . . ?
C8 C3 C4 117.7(8) . . ?
C8 C3 Pt1 121.5(7) . . ?
C4 C3 Pt1 120.8(7) . . ?
C3 C4 C5 121.0(8) . . ?
C3 C4 H4A 119.5 . . ?
C5 C4 H4A 119.5 . . ?
C6 C5 C4 121.2(9) . . ?
C6 C5 H5A 119.4 . . ?
C4 C5 H5A 119.4 . . ?
C5 C6 C7 117.2(9) . . ?
C5 C6 C9 121.3(9) . . ?
C7 C6 C9 121.4(9) . . ?
C6 C7 C8 121.3(9) . . ?
C6 C7 H7A 119.4 . . ?
C8 C7 H7A 119.4 . . ?
C3 C8 C7 121.6(9) . . ?
C3 C8 H8A 119.2 . . ?
C7 C8 H8A 119.2 . . ?
C12 C13 C14 119.0(9) . . ?
C12 C13 H13A 120.5 . . ?
C14 C13 H13A 120.5 . . ?
C22 C21 C20 120.4(10) . . ?
C22 C21 H21A 119.8 . . ?
C20 C21 H21A 119.8 . . ?
C18 C19 C14 122.1(9) . . ?
C18 C19 H19A 119.0 . . ?
C14 C19 H19A 119.0 . . ?
C13 C14 C15 119.5(9) . . ?
C13 C14 C19 122.6(9) . . ?
C15 C14 C19 117.9(9) . . ?
C6 C9 H9A 109.5 . . ?
C6 C9 H9B 109.5 . . ?
H9A C9 H9B 109.5 . . ?
C6 C9 H9C 109.5 . . ?
H9A C9 H9C 109.5 . . ?
H9B C9 H9C 109.5 . . ?
C19 C18 C17 121.1(9) . . ?
C19 C18 H18A 119.5 . . ?
C17 C18 H18A 119.5 . . ?
C13 C12 C11 121.6(10) . . ?
C13 C12 H12A 119.2 . . ?
C11 C12 H12A 119.2 . . ?
C21 C20 C17 119.5(9) . . ?
C21 C20 H20A 120.2 . . ?
C17 C20 H20A 120.2 . . ?
N1 C16 C17 123.6(9) . . ?
N1 C16 C15 116.5(8) . . ?
C17 C16 C15 119.8(9) . . ?
C10 C11 C12 121.0(9) . . ?
C10 C11 H11A 119.5 . . ?
C12 C11 H11A 119.5 . . ?
C14 C15 C10 121.1(9) . . ?
C14 C15 C16 120.1(9) . . ?
C10 C15 C16 118.8(8) . . ?
N1 C22 C21 121.6(9) . . ?
N1 C22 H22A 119.2 . . ?
C21 C22 H22A 119.2 . . ?
C16 C17 C20 116.3(9) . . ?
C16 C17 C18 119.0(9) . . ?
C20 C17 C18 124.6(9) . . ?
C22 N1 C16 118.5(8) . . ?
C22 N1 Pt1 129.1(6) . . ?
C16 N1 Pt1 112.3(6) . . ?

loop_
_geom_torsion_atom_site_label_1
_geom_torsion_atom_site_label_2
_geom_torsion_atom_site_label_3
_geom_torsion_atom_site_label_4
_geom_torsion
_geom_torsion_site_symmetry_1
_geom_torsion_site_symmetry_2
_geom_torsion_site_symmetry_3
_geom_torsion_site_symmetry_4
_geom_torsion_publ_flag
C3 Pt1 S1 C2 -46.9(5) . . . . ?
C10 Pt1 S1 C2 142(3) . . . . ?
N1 Pt1 S1 C2 135.7(5) . . . . ?
C3 Pt1 S1 C1 62.2(5) . . . . ?
C10 Pt1 S1 C1 -109(3) . . . . ?
N1 Pt1 S1 C1 -115.2(4) . . . . ?
C3 Pt1 C10 C11 5.7(9) . . . . ?
N1 Pt1 C10 C11 -176.8(9) . . . . ?
S1 Pt1 C10 C11 177(2) . . . . ?
C3 Pt1 C10 C15 -174.0(6) . . . . ?
N1 Pt1 C10 C15 3.4(6) . . . . ?
S1 Pt1 C10 C15 -3(3) . . . . ?
C10 Pt1 C3 C8 -93.5(8) . . . . ?
N1 Pt1 C3 C8 -117(3) . . . . ?
S1 Pt1 C3 C8 87.3(8) . . . . ?
C10 Pt1 C3 C4 87.3(8) . . . . ?
N1 Pt1 C3 C4 64(3) . . . . ?
S1 Pt1 C3 C4 -91.9(8) . . . . ?
C8 C3 C4 C5 -3.3(14) . . . . ?
Pt1 C3 C4 C5 176.0(7) . . . . ?
C3 C4 C5 C6 2.8(14) . . . . ?
C4 C5 C6 C7 -1.4(14) . . . . ?
C4 C5 C6 C9 -179.3(9) . . . . ?
C5 C6 C7 C8 0.7(14) . . . . ?
C9 C6 C7 C8 178.5(9) . . . . ?
C4 C3 C8 C7 2.6(14) . . . . ?
Pt1 C3 C8 C7 -176.7(7) . . . . ?
C6 C7 C8 C3 -1.3(15) . . . . ?
C12 C13 C14 C15 -0.2(14) . . . . ?
C12 C13 C14 C19 178.6(9) . . . . ?
C18 C19 C14 C13 178.8(9) . . . . ?
C18 C19 C14 C15 -2.3(14) . . . . ?
C14 C19 C18 C17 -0.3(15) . . . . ?
C14 C13 C12 C11 -1.1(15) . . . . ?
C22 C21 C20 C17 2.3(15) . . . . ?
C15 C10 C11 C12 0.9(14) . . . . ?
Pt1 C10 C11 C12 -178.9(7) . . . . ?
C13 C12 C11 C10 0.8(15) . . . . ?
C13 C14 C15 C10 1.8(13) . . . . ?
C19 C14 C15 C10 -177.0(8) . . . . ?
C13 C14 C15 C16 -178.0(8) . . . . ?
C19 C14 C15 C16 3.2(13) . . . . ?
C11 C10 C15 C14 -2.2(13) . . . . ?
Pt1 C10 C15 C14 177.6(7) . . . . ?
C11 C10 C15 C16 177.6(8) . . . . ?
Pt1 C10 C15 C16 -2.6(10) . . . . ?
N1 C16 C15 C14 178.9(8) . . . . ?
C17 C16 C15 C14 -1.4(13) . . . . ?
N1 C16 C15 C10 -1.0(12) . . . . ?
C17 C16 C15 C10 178.8(8) . . . . ?
C20 C21 C22 N1 -0.9(15) . . . . ?
N1 C16 C17 C20 0.2(13) . . . . ?
C15 C16 C17 C20 -179.5(8) . . . . ?
N1 C16 C17 C18 178.5(8) . . . . ?
C15 C16 C17 C18 -1.3(13) . . . . ?
C21 C20 C17 C16 -1.9(14) . . . . ?
C21 C20 C17 C18 180.0(9) . . . . ?
C19 C18 C17 C16 2.2(14) . . . . ?
C19 C18 C17 C20 -179.8(9) . . . . ?
C21 C22 N1 C16 -0.8(14) . . . . ?
C21 C22 N1 Pt1 175.6(7) . . . . ?
C17 C16 N1 C22 1.1(13) . . . . ?
C15 C16 N1 C22 -179.2(8) . . . . ?
C17 C16 N1 Pt1 -175.9(7) . . . . ?
C15 C16 N1 Pt1 3.9(10) . . . . ?
C3 Pt1 N1 C22 -157(3) . . . . ?
C10 Pt1 N1 C22 179.4(9) . . . . ?
S1 Pt1 N1 C22 -1.2(8) . . . . ?
C3 Pt1 N1 C16 20(3) . . . . ?
C10 Pt1 N1 C16 -4.1(6) . . . . ?
S1 Pt1 N1 C16 175.4(6) . . . . ?

_diffrn_measured_fraction_theta_max 0.986
_diffrn_reflns_theta_full        27.61
_diffrn_measured_fraction_theta_full 0.986
_refine_diff_density_max         1.673
_refine_diff_density_min         -3.469
_refine_diff_density_rms         0.449

#===END

 
data_3b
_publ_requested_journal          Organometallics
_publ_contact_author_name        Puddephatt
_publ_contact_author_address     'University of Western Ontario'
_publ_contact_author_email       pudd@uwo.ca
_publ_contact_author_phone       519-661-2111
_publ_contact_author_fax         519-661-3022
loop_
_publ_author_name
_publ_author_address
'Puddephatt, R.J.' 'University of Western Ontario'

_audit_creation_method           SHELXL-97
_chemical_name_systematic        
; 
 ? 
;
_chemical_name_common            ?
_chemical_melting_point          ?
_chemical_formula_moiety         'C43 H37 N O P2 Pt'
_chemical_formula_sum            'C43 H37 N O P2 Pt'
_chemical_formula_weight         840.77

loop_
_atom_type_symbol
_atom_type_description
_atom_type_scat_dispersion_real
_atom_type_scat_dispersion_imag
_atom_type_scat_source
C C 0.0033 0.0016 'International Tables Vol C Tables 4.2.6.8 and 6.1.1.4'
H H 0.0000 0.0000 'International Tables Vol C Tables 4.2.6.8 and 6.1.1.4'
N N 0.0061 0.0033 'International Tables Vol C Tables 4.2.6.8 and 6.1.1.4'
O O 0.0106 0.0060 'International Tables Vol C Tables 4.2.6.8 and 6.1.1.4'
P P 0.1023 0.0942 'International Tables Vol C Tables 4.2.6.8 and 6.1.1.4'
Pt Pt -1.7033 8.3905 'International Tables Vol C Tables 4.2.6.8 and 6.1.1.4'

_symmetry_cell_setting           Triclinic
_symmetry_space_group_name_H-M   P-1
_symmetry_space_group_name_Hall  '-P 1'

loop_
_symmetry_equiv_pos_as_xyz
'x, y, z'
'-x, -y, -z'

_cell_length_a                   8.9759(4)
_cell_length_b                   9.9660(4)
_cell_length_c                   19.4068(9)
_cell_angle_alpha                89.980(3)
_cell_angle_beta                 89.733(2)
_cell_angle_gamma                88.706(2)
_cell_volume                     1735.55(13)
_cell_formula_units_Z            2
_cell_measurement_temperature    150(2)
_cell_measurement_reflns_used    9328
_cell_measurement_theta_min      2.30
_cell_measurement_theta_max      27.33

_exptl_crystal_description       block
_exptl_crystal_colour            yellow
_exptl_crystal_size_max          0.06
_exptl_crystal_size_mid          0.05
_exptl_crystal_size_min          0.03
_exptl_crystal_density_meas      ?
_exptl_crystal_density_diffrn    1.609
_exptl_crystal_density_method    'not measured'
_exptl_crystal_F_000             836
_exptl_absorpt_coefficient_mu    4.170
_exptl_absorpt_correction_type   multi-scan
_exptl_absorpt_correction_T_min  0.7880
_exptl_absorpt_correction_T_max  0.8851
_exptl_absorpt_process_details   ?

_exptl_special_details           
; 
 ? 
;

_diffrn_ambient_temperature      150(2)
_diffrn_radiation_wavelength     0.71073
_diffrn_radiation_type           MoK\a
_diffrn_radiation_source         'fine-focus sealed tube'
_diffrn_radiation_monochromator  graphite
_diffrn_measurement_device_type  'Bruker APEX-II CCD'
_diffrn_measurement_method       '\f and \w scans'
_diffrn_detector_area_resol_mean ?
_diffrn_reflns_number            65476
_diffrn_reflns_av_R_equivalents  0.0581
_diffrn_reflns_av_sigmaI/netI    0.0324
_diffrn_reflns_limit_h_min       -11
_diffrn_reflns_limit_h_max       11
_diffrn_reflns_limit_k_min       -12
_diffrn_reflns_limit_k_max       12
_diffrn_reflns_limit_l_min       -24
_diffrn_reflns_limit_l_max       24
_diffrn_reflns_theta_min         1.05
_diffrn_reflns_theta_max         26.73
_reflns_number_total             7376
_reflns_number_gt                6670
_reflns_threshold_expression     >2sigma(I)

_computing_data_collection       'Bruker APEX2'
_computing_cell_refinement       'Bruker SAINT'
_computing_data_reduction        'Bruker SAINT'
_computing_structure_solution    'SHELXS-97 (Sheldrick, 2008)'
_computing_structure_refinement  'SHELXL-97 (Sheldrick, 2008)'
_computing_molecular_graphics    'Bruker SHELXTL'
_computing_publication_material  'Bruker SHELXTL'

_refine_special_details          
; 
 Refinement of F^2^ against ALL reflections.  The weighted R-factor wR and 
 goodness of fit S are based on F^2^, conventional R-factors R are based 
 on F, with F set to zero for negative F^2^. The threshold expression of 
 F^2^ > 2sigma(F^2^) is used only for calculating R-factors(gt) etc. and is 
 not relevant to the choice of reflections for refinement.  R-factors based 
 on F^2^ are statistically about twice as large as those based on F, and R- 
 factors based on ALL data will be even larger. 
;

_refine_ls_structure_factor_coef Fsqd
_refine_ls_matrix_type           full
_refine_ls_weighting_scheme      calc
_refine_ls_weighting_details     
'calc w=1/[\s^2^(Fo^2^)+(0.0085P)^2^+2.5254P] where P=(Fo^2^+2Fc^2^)/3'
_atom_sites_solution_primary     direct
_atom_sites_solution_secondary   difmap
_atom_sites_solution_hydrogens   geom
_refine_ls_hydrogen_treatment    constr
_refine_ls_extinction_method     none
_refine_ls_extinction_coef       ?
_refine_ls_number_reflns         7376
_refine_ls_number_parameters     434
_refine_ls_number_restraints     0
_refine_ls_R_factor_all          0.0265
_refine_ls_R_factor_gt           0.0209
_refine_ls_wR_factor_ref         0.0472
_refine_ls_wR_factor_gt          0.0389
_refine_ls_goodness_of_fit_ref   1.092
_refine_ls_restrained_S_all      1.092
_refine_ls_shift/su_max          0.001
_refine_ls_shift/su_mean         0.000

loop_
_atom_site_label
_atom_site_type_symbol
_atom_site_fract_x
_atom_site_fract_y
_atom_site_fract_z
_atom_site_U_iso_or_equiv
_atom_site_adp_type
_atom_site_occupancy
_atom_site_symmetry_multiplicity
_atom_site_calc_flag
_atom_site_refinement_flags
_atom_site_disorder_assembly
_atom_site_disorder_group
Pt1 Pt -0.154782(13) 0.390679(11) 0.187417(6) 0.01715(4) Uani 1 1 d . . .
P1 P -0.03928(9) 0.58500(7) 0.22088(4) 0.01756(16) Uani 1 1 d . . .
P2 P 0.12658(9) 0.49772(8) 0.35204(4) 0.02096(17) Uani 1 1 d . . .
O1 O 0.3320(3) -0.0156(2) 0.28730(12) 0.0358(6) Uani 1 1 d . . .
N1 N -0.3528(3) 0.4775(2) 0.14513(13) 0.0212(6) Uani 1 1 d . . .
C1 C 0.0154(3) 0.2756(3) 0.22217(15) 0.0195(6) Uani 1 1 d . . .
C2 C 0.1408(3) 0.2449(3) 0.18221(16) 0.0229(7) Uani 1 1 d . . .
H2 H 0.1531 0.2907 0.1397 0.027 Uiso 1 1 calc R . .
C3 C 0.2497(4) 0.1497(3) 0.20182(16) 0.0246(7) Uani 1 1 d . . .
H3 H 0.3335 0.1315 0.1729 0.030 Uiso 1 1 calc R . .
C4 C 0.2340(4) 0.0827(3) 0.26366(16) 0.0238(7) Uani 1 1 d . . .
C5 C 0.1121(4) 0.1126(3) 0.30620(16) 0.0239(7) Uani 1 1 d . . .
H5 H 0.1015 0.0678 0.3491 0.029 Uiso 1 1 calc R . .
C6 C 0.0067(3) 0.2076(3) 0.28573(15) 0.0223(7) Uani 1 1 d . . .
H6 H -0.0748 0.2278 0.3157 0.027 Uiso 1 1 calc R . .
C7 C 0.0072(3) 0.6880(3) 0.14578(15) 0.0187(6) Uani 1 1 d . . .
C8 C 0.0924(3) 0.8042(3) 0.14894(16) 0.0225(7) Uani 1 1 d . . .
H8 H 0.1267 0.8350 0.1923 0.027 Uiso 1 1 calc R . .
C9 C 0.1272(4) 0.8746(3) 0.08959(17) 0.0274(7) Uani 1 1 d . . .
H9 H 0.1824 0.9546 0.0927 0.033 Uiso 1 1 calc R . .
C10 C 0.0816(4) 0.8290(3) 0.02572(17) 0.0308(8) Uani 1 1 d . . .
H10 H 0.1071 0.8767 -0.0149 0.037 Uiso 1 1 calc R . .
C11 C -0.0008(4) 0.7138(3) 0.02133(16) 0.0283(7) Uani 1 1 d . . .
H11 H -0.0319 0.6825 -0.0224 0.034 Uiso 1 1 calc R . .
C12 C -0.0386(3) 0.6435(3) 0.08073(15) 0.0228(7) Uani 1 1 d . . .
H12 H -0.0958 0.5648 0.0772 0.027 Uiso 1 1 calc R . .
C13 C -0.1481(3) 0.6897(3) 0.28171(15) 0.0200(6) Uani 1 1 d . . .
C14 C -0.1266(4) 0.8254(3) 0.29393(16) 0.0255(7) Uani 1 1 d . . .
H14 H -0.0562 0.8730 0.2672 0.031 Uiso 1 1 calc R . .
C15 C -0.2080(4) 0.8911(3) 0.34518(17) 0.0326(8) Uani 1 1 d . . .
H15 H -0.1939 0.9840 0.3529 0.039 Uiso 1 1 calc R . .
C16 C -0.3092(4) 0.8233(4) 0.38516(17) 0.0332(8) Uani 1 1 d . . .
H16 H -0.3629 0.8689 0.4207 0.040 Uiso 1 1 calc R . .
C17 C -0.3318(4) 0.6890(4) 0.37317(17) 0.0334(8) Uani 1 1 d . . .
H17 H -0.4020 0.6421 0.4002 0.040 Uiso 1 1 calc R . .
C18 C -0.2521(4) 0.6222(3) 0.32164(16) 0.0273(7) Uani 1 1 d . . .
H18 H -0.2685 0.5297 0.3135 0.033 Uiso 1 1 calc R . .
C19 C 0.1419(3) 0.5687(3) 0.26343(15) 0.0218(7) Uani 1 1 d . . .
H19A H 0.1873 0.6581 0.2660 0.026 Uiso 1 1 calc R . .
H19B H 0.2086 0.5098 0.2354 0.026 Uiso 1 1 calc R . .
C20 C 0.3152(3) 0.4254(3) 0.36418(16) 0.0225(7) Uani 1 1 d . . .
C21 C 0.4086(4) 0.3791(3) 0.31172(17) 0.0277(7) Uani 1 1 d . . .
H21 H 0.3798 0.3934 0.2652 0.033 Uiso 1 1 calc R . .
C22 C 0.5425(4) 0.3126(3) 0.32524(17) 0.0294(8) Uani 1 1 d . . .
H22 H 0.6035 0.2818 0.2881 0.035 Uiso 1 1 calc R . .
C23 C 0.5871(4) 0.2913(4) 0.39121(19) 0.0415(9) Uani 1 1 d . . .
H23 H 0.6787 0.2454 0.4006 0.050 Uiso 1 1 calc R . .
C24 C 0.4970(5) 0.3374(5) 0.4445(2) 0.0679(16) Uani 1 1 d . . .
H24 H 0.5274 0.3236 0.4908 0.082 Uiso 1 1 calc R . .
C25 C 0.3638(5) 0.4031(5) 0.43120(19) 0.0556(13) Uani 1 1 d . . .
H25 H 0.3037 0.4339 0.4687 0.067 Uiso 1 1 calc R . .
C26 C 0.1373(4) 0.6503(3) 0.40522(15) 0.0230(7) Uani 1 1 d . . .
C27 C 0.0321(4) 0.6662(3) 0.45780(16) 0.0313(8) Uani 1 1 d . . .
H27 H -0.0417 0.6004 0.4643 0.038 Uiso 1 1 calc R . .
C28 C 0.0344(5) 0.7777(4) 0.50091(18) 0.0403(9) Uani 1 1 d . . .
H28 H -0.0373 0.7875 0.5368 0.048 Uiso 1 1 calc R . .
C29 C 0.1409(5) 0.8742(4) 0.49152(19) 0.0420(10) Uani 1 1 d . . .
H29 H 0.1427 0.9501 0.5210 0.050 Uiso 1 1 calc R . .
C30 C 0.2451(4) 0.8599(3) 0.43901(19) 0.0373(9) Uani 1 1 d . . .
H30 H 0.3176 0.9267 0.4323 0.045 Uiso 1 1 calc R . .
C31 C 0.2439(4) 0.7487(3) 0.39623(17) 0.0298(8) Uani 1 1 d . . .
H31 H 0.3162 0.7394 0.3605 0.036 Uiso 1 1 calc R . .
C32 C -0.2503(3) 0.2232(3) 0.14830(15) 0.0188(6) Uani 1 1 d . . .
C33 C -0.1983(4) 0.0896(3) 0.15056(15) 0.0215(7) Uani 1 1 d . . .
H33 H -0.1106 0.0682 0.1759 0.026 Uiso 1 1 calc R . .
C34 C -0.2717(4) -0.0126(3) 0.11654(16) 0.0262(7) Uani 1 1 d . . .
H34 H -0.2341 -0.1024 0.1193 0.031 Uiso 1 1 calc R . .
C35 C -0.3988(4) 0.0157(3) 0.07887(16) 0.0277(7) Uani 1 1 d . . .
H35 H -0.4478 -0.0538 0.0551 0.033 Uiso 1 1 calc R . .
C36 C -0.4544(4) 0.1468(3) 0.07613(16) 0.0263(7) Uani 1 1 d . . .
H36 H -0.5422 0.1670 0.0507 0.032 Uiso 1 1 calc R . .
C37 C -0.3812(3) 0.2494(3) 0.11088(15) 0.0198(6) Uani 1 1 d . . .
C38 C -0.4398(3) 0.3893(3) 0.11050(15) 0.0195(6) Uani 1 1 d . . .
C39 C -0.4003(4) 0.6073(3) 0.14833(17) 0.0269(7) Uani 1 1 d . . .
H39 H -0.3413 0.6692 0.1727 0.032 Uiso 1 1 calc R . .
C40 C -0.5290(4) 0.6538(3) 0.11827(17) 0.0294(8) Uani 1 1 d . . .
H40 H -0.5573 0.7460 0.1216 0.035 Uiso 1 1 calc R . .
C41 C -0.6176(4) 0.5654(3) 0.08303(17) 0.0298(8) Uani 1 1 d . . .
H41 H -0.7076 0.5953 0.0619 0.036 Uiso 1 1 calc R . .
C42 C -0.5716(4) 0.4324(3) 0.07941(16) 0.0263(7) Uani 1 1 d . . .
H42 H -0.6306 0.3698 0.0555 0.032 Uiso 1 1 calc R . .
C50 C 0.4581(4) -0.0440(4) 0.2458(2) 0.0408(9) Uani 1 1 d . . .
H50A H 0.5201 0.0356 0.2431 0.061 Uiso 1 1 calc R . .
H50B H 0.4260 -0.0686 0.1993 0.061 Uiso 1 1 calc R . .
H50C H 0.5160 -0.1186 0.2659 0.061 Uiso 1 1 calc R . .

loop_
_atom_site_aniso_label
_atom_site_aniso_U_11
_atom_site_aniso_U_22
_atom_site_aniso_U_33
_atom_site_aniso_U_23
_atom_site_aniso_U_13
_atom_site_aniso_U_12
Pt1 0.01863(6) 0.01421(6) 0.01858(6) 0.00031(4) -0.00113(4) 0.00058(4)
P1 0.0198(4) 0.0160(4) 0.0168(4) 0.0004(3) -0.0013(3) -0.0002(3)
P2 0.0225(4) 0.0217(4) 0.0187(4) 0.0025(3) -0.0009(3) 0.0008(3)
O1 0.0324(15) 0.0376(14) 0.0368(14) 0.0099(11) 0.0018(11) 0.0147(11)
N1 0.0230(15) 0.0184(13) 0.0222(14) 0.0004(11) -0.0002(11) -0.0003(11)
C1 0.0226(17) 0.0146(15) 0.0215(16) -0.0017(12) -0.0035(12) -0.0037(12)
C2 0.0248(18) 0.0238(17) 0.0202(16) 0.0024(13) 0.0000(13) -0.0027(13)
C3 0.0209(17) 0.0254(17) 0.0275(17) -0.0014(14) 0.0016(13) 0.0029(13)
C4 0.0226(18) 0.0191(16) 0.0295(18) 0.0006(13) -0.0052(13) 0.0031(13)
C5 0.0296(19) 0.0216(16) 0.0205(16) 0.0042(13) -0.0002(13) 0.0009(14)
C6 0.0227(17) 0.0223(16) 0.0217(16) 0.0014(13) 0.0012(13) 0.0014(13)
C7 0.0201(16) 0.0170(15) 0.0187(15) 0.0016(12) 0.0020(12) 0.0056(12)
C8 0.0219(17) 0.0189(16) 0.0266(17) -0.0013(13) 0.0004(13) 0.0001(12)
C9 0.0276(19) 0.0198(17) 0.0346(19) 0.0021(14) 0.0045(14) -0.0008(13)
C10 0.037(2) 0.0304(19) 0.0240(18) 0.0102(14) 0.0086(15) 0.0056(15)
C11 0.034(2) 0.0330(19) 0.0179(16) 0.0008(14) -0.0018(14) 0.0072(15)
C12 0.0233(17) 0.0214(16) 0.0237(16) -0.0004(13) -0.0014(13) 0.0024(13)
C13 0.0203(16) 0.0223(16) 0.0173(15) -0.0006(12) -0.0019(12) 0.0008(12)
C14 0.0287(19) 0.0231(17) 0.0248(17) -0.0001(13) 0.0037(14) -0.0006(13)
C15 0.038(2) 0.0263(18) 0.033(2) -0.0068(15) 0.0012(16) 0.0054(15)
C16 0.031(2) 0.042(2) 0.0253(18) -0.0086(16) 0.0046(15) 0.0079(16)
C17 0.030(2) 0.044(2) 0.0265(18) 0.0002(16) 0.0098(15) -0.0019(16)
C18 0.0285(19) 0.0272(18) 0.0263(18) -0.0004(14) 0.0004(14) -0.0030(14)
C19 0.0237(18) 0.0220(16) 0.0196(16) 0.0001(12) -0.0022(12) -0.0004(13)
C20 0.0215(17) 0.0205(16) 0.0254(17) 0.0034(13) 0.0010(13) 0.0003(12)
C21 0.0286(19) 0.0305(18) 0.0239(17) -0.0009(14) -0.0040(14) 0.0024(14)
C22 0.0258(19) 0.0332(19) 0.0291(18) -0.0024(15) 0.0032(14) 0.0041(14)
C23 0.032(2) 0.055(3) 0.037(2) 0.0103(18) 0.0000(16) 0.0169(18)
C24 0.056(3) 0.119(4) 0.026(2) 0.019(2) 0.000(2) 0.048(3)
C25 0.051(3) 0.094(4) 0.0202(19) 0.009(2) 0.0048(17) 0.036(2)
C26 0.0271(18) 0.0226(16) 0.0193(16) 0.0022(13) -0.0066(13) 0.0041(13)
C27 0.038(2) 0.0321(19) 0.0231(18) 0.0029(14) 0.0000(15) 0.0074(15)
C28 0.049(3) 0.047(2) 0.0232(19) -0.0029(17) -0.0018(16) 0.0192(19)
C29 0.060(3) 0.032(2) 0.033(2) -0.0107(16) -0.0207(19) 0.0164(19)
C30 0.045(2) 0.0275(19) 0.039(2) 0.0001(16) -0.0185(18) 0.0033(16)
C31 0.035(2) 0.0289(18) 0.0253(18) 0.0001(14) -0.0071(14) 0.0007(15)
C32 0.0199(16) 0.0197(15) 0.0168(15) 0.0012(12) 0.0044(12) -0.0008(12)
C33 0.0248(18) 0.0188(16) 0.0208(16) 0.0015(12) 0.0018(12) -0.0001(12)
C34 0.037(2) 0.0149(16) 0.0264(17) -0.0009(13) 0.0039(14) 0.0010(13)
C35 0.038(2) 0.0214(17) 0.0244(17) -0.0062(13) -0.0026(14) -0.0067(14)
C36 0.0276(19) 0.0291(18) 0.0222(17) -0.0017(14) -0.0041(13) -0.0011(14)
C37 0.0236(17) 0.0172(15) 0.0186(15) -0.0009(12) 0.0043(12) -0.0010(12)
C38 0.0208(17) 0.0213(16) 0.0164(15) -0.0007(12) 0.0041(12) -0.0014(12)
C39 0.0282(19) 0.0191(16) 0.0333(19) -0.0026(14) -0.0030(14) 0.0012(13)
C40 0.0276(19) 0.0213(17) 0.039(2) 0.0012(14) -0.0004(15) 0.0065(14)
C41 0.0200(18) 0.0346(19) 0.0344(19) 0.0019(15) -0.0022(14) 0.0079(14)
C42 0.0225(18) 0.0289(18) 0.0277(18) -0.0030(14) -0.0003(13) -0.0016(14)
C50 0.035(2) 0.039(2) 0.047(2) 0.0022(18) -0.0016(17) 0.0176(17)

_geom_special_details            
; 
 All esds (except the esd in the dihedral angle between two l.s. planes) 
 are estimated using the full covariance matrix.  The cell esds are taken 
 into account individually in the estimation of esds in distances, angles 
 and torsion angles; correlations between esds in cell parameters are only 
 used when they are defined by crystal symmetry.  An approximate (isotropic) 
 treatment of cell esds is used for estimating esds involving l.s. planes. 
;

loop_
_geom_bond_atom_site_label_1
_geom_bond_atom_site_label_2
_geom_bond_distance
_geom_bond_site_symmetry_2
_geom_bond_publ_flag
Pt1 C1 2.008(3) . ?
Pt1 C32 2.042(3) . ?
Pt1 N1 2.127(3) . ?
Pt1 P1 2.3118(8) . ?
P1 C19 1.831(3) . ?
P1 C7 1.835(3) . ?
P1 C13 1.839(3) . ?
P2 C20 1.841(3) . ?
P2 C26 1.843(3) . ?
P2 C19 1.865(3) . ?
O1 C4 1.381(4) . ?
O1 C50 1.411(4) . ?
N1 C39 1.354(4) . ?
N1 C38 1.367(4) . ?
C1 C2 1.393(4) . ?
C1 C6 1.410(4) . ?
C2 C3 1.401(4) . ?
C2 H2 0.9500 . ?
C3 C4 1.382(4) . ?
C3 H3 0.9500 . ?
C4 C5 1.394(4) . ?
C5 C6 1.383(4) . ?
C5 H5 0.9500 . ?
C6 H6 0.9500 . ?
C7 C8 1.403(4) . ?
C7 C12 1.405(4) . ?
C8 C9 1.386(4) . ?
C8 H8 0.9500 . ?
C9 C10 1.387(5) . ?
C9 H9 0.9500 . ?
C10 C11 1.383(5) . ?
C10 H10 0.9500 . ?
C11 C12 1.393(4) . ?
C11 H11 0.9500 . ?
C12 H12 0.9500 . ?
C13 C14 1.391(4) . ?
C13 C18 1.395(4) . ?
C14 C15 1.387(4) . ?
C14 H14 0.9500 . ?
C15 C16 1.379(5) . ?
C15 H15 0.9500 . ?
C16 C17 1.378(5) . ?
C16 H16 0.9500 . ?
C17 C18 1.388(4) . ?
C17 H17 0.9500 . ?
C18 H18 0.9500 . ?
C19 H19A 0.9900 . ?
C19 H19B 0.9900 . ?
C20 C21 1.388(4) . ?
C20 C25 1.390(5) . ?
C21 C22 1.385(5) . ?
C21 H21 0.9500 . ?
C22 C23 1.358(5) . ?
C22 H22 0.9500 . ?
C23 C24 1.382(5) . ?
C23 H23 0.9500 . ?
C24 C25 1.375(5) . ?
C24 H24 0.9500 . ?
C25 H25 0.9500 . ?
C26 C27 1.394(4) . ?
C26 C31 1.396(5) . ?
C27 C28 1.392(5) . ?
C27 H27 0.9500 . ?
C28 C29 1.383(6) . ?
C28 H28 0.9500 . ?
C29 C30 1.385(6) . ?
C29 H29 0.9500 . ?
C30 C31 1.385(5) . ?
C30 H30 0.9500 . ?
C31 H31 0.9500 . ?
C32 C33 1.402(4) . ?
C32 C37 1.403(4) . ?
C33 C34 1.394(4) . ?
C33 H33 0.9500 . ?
C34 C35 1.382(5) . ?
C34 H34 0.9500 . ?
C35 C36 1.389(4) . ?
C35 H35 0.9500 . ?
C36 C37 1.402(4) . ?
C36 H36 0.9500 . ?
C37 C38 1.479(4) . ?
C38 C42 1.390(4) . ?
C39 C40 1.368(4) . ?
C39 H39 0.9500 . ?
C40 C41 1.383(5) . ?
C40 H40 0.9500 . ?
C41 C42 1.381(4) . ?
C41 H41 0.9500 . ?
C42 H42 0.9500 . ?
C50 H50A 0.9800 . ?
C50 H50B 0.9800 . ?
C50 H50C 0.9800 . ?

loop_
_geom_angle_atom_site_label_1
_geom_angle_atom_site_label_2
_geom_angle_atom_site_label_3
_geom_angle
_geom_angle_site_symmetry_1
_geom_angle_site_symmetry_3
_geom_angle_publ_flag
C1 Pt1 C32 89.33(12) . . ?
C1 Pt1 N1 169.15(10) . . ?
C32 Pt1 N1 79.87(11) . . ?
C1 Pt1 P1 91.87(8) . . ?
C32 Pt1 P1 174.42(8) . . ?
N1 Pt1 P1 98.98(7) . . ?
C19 P1 C7 101.40(14) . . ?
C19 P1 C13 102.63(14) . . ?
C7 P1 C13 108.33(13) . . ?
C19 P1 Pt1 117.96(10) . . ?
C7 P1 Pt1 110.86(10) . . ?
C13 P1 Pt1 114.46(10) . . ?
C20 P2 C26 100.60(14) . . ?
C20 P2 C19 101.26(14) . . ?
C26 P2 C19 101.41(14) . . ?
C4 O1 C50 116.6(3) . . ?
C39 N1 C38 117.7(3) . . ?
C39 N1 Pt1 127.8(2) . . ?
C38 N1 Pt1 114.51(19) . . ?
C2 C1 C6 115.6(3) . . ?
C2 C1 Pt1 122.6(2) . . ?
C6 C1 Pt1 121.4(2) . . ?
C1 C2 C3 123.0(3) . . ?
C1 C2 H2 118.5 . . ?
C3 C2 H2 118.5 . . ?
C4 C3 C2 119.3(3) . . ?
C4 C3 H3 120.4 . . ?
C2 C3 H3 120.4 . . ?
O1 C4 C3 124.3(3) . . ?
O1 C4 C5 116.0(3) . . ?
C3 C4 C5 119.7(3) . . ?
C6 C5 C4 119.8(3) . . ?
C6 C5 H5 120.1 . . ?
C4 C5 H5 120.1 . . ?
C5 C6 C1 122.6(3) . . ?
C5 C6 H6 118.7 . . ?
C1 C6 H6 118.7 . . ?
C8 C7 C12 118.1(3) . . ?
C8 C7 P1 124.1(2) . . ?
C12 C7 P1 117.7(2) . . ?
C9 C8 C7 120.8(3) . . ?
C9 C8 H8 119.6 . . ?
C7 C8 H8 119.6 . . ?
C8 C9 C10 120.3(3) . . ?
C8 C9 H9 119.8 . . ?
C10 C9 H9 119.8 . . ?
C11 C10 C9 119.8(3) . . ?
C11 C10 H10 120.1 . . ?
C9 C10 H10 120.1 . . ?
C10 C11 C12 120.3(3) . . ?
C10 C11 H11 119.8 . . ?
C12 C11 H11 119.8 . . ?
C11 C12 C7 120.6(3) . . ?
C11 C12 H12 119.7 . . ?
C7 C12 H12 119.7 . . ?
C14 C13 C18 118.9(3) . . ?
C14 C13 P1 125.3(2) . . ?
C18 C13 P1 115.6(2) . . ?
C15 C14 C13 119.9(3) . . ?
C15 C14 H14 120.1 . . ?
C13 C14 H14 120.1 . . ?
C16 C15 C14 121.0(3) . . ?
C16 C15 H15 119.5 . . ?
C14 C15 H15 119.5 . . ?
C17 C16 C15 119.5(3) . . ?
C17 C16 H16 120.2 . . ?
C15 C16 H16 120.2 . . ?
C16 C17 C18 120.2(3) . . ?
C16 C17 H17 119.9 . . ?
C18 C17 H17 119.9 . . ?
C17 C18 C13 120.5(3) . . ?
C17 C18 H18 119.7 . . ?
C13 C18 H18 119.7 . . ?
P1 C19 P2 112.34(16) . . ?
P1 C19 H19A 109.1 . . ?
P2 C19 H19A 109.1 . . ?
P1 C19 H19B 109.1 . . ?
P2 C19 H19B 109.1 . . ?
H19A C19 H19B 107.9 . . ?
C21 C20 C25 116.5(3) . . ?
C21 C20 P2 125.2(2) . . ?
C25 C20 P2 118.0(3) . . ?
C22 C21 C20 121.9(3) . . ?
C22 C21 H21 119.0 . . ?
C20 C21 H21 119.0 . . ?
C23 C22 C21 120.4(3) . . ?
C23 C22 H22 119.8 . . ?
C21 C22 H22 119.8 . . ?
C22 C23 C24 118.9(3) . . ?
C22 C23 H23 120.6 . . ?
C24 C23 H23 120.6 . . ?
C25 C24 C23 120.8(4) . . ?
C25 C24 H24 119.6 . . ?
C23 C24 H24 119.6 . . ?
C24 C25 C20 121.5(4) . . ?
C24 C25 H25 119.3 . . ?
C20 C25 H25 119.3 . . ?
C27 C26 C31 118.8(3) . . ?
C27 C26 P2 117.0(2) . . ?
C31 C26 P2 124.1(3) . . ?
C28 C27 C26 120.5(3) . . ?
C28 C27 H27 119.8 . . ?
C26 C27 H27 119.8 . . ?
C29 C28 C27 120.0(4) . . ?
C29 C28 H28 120.0 . . ?
C27 C28 H28 120.0 . . ?
C28 C29 C30 119.9(3) . . ?
C28 C29 H29 120.1 . . ?
C30 C29 H29 120.1 . . ?
C29 C30 C31 120.3(4) . . ?
C29 C30 H30 119.8 . . ?
C31 C30 H30 119.8 . . ?
C30 C31 C26 120.5(3) . . ?
C30 C31 H31 119.8 . . ?
C26 C31 H31 119.8 . . ?
C33 C32 C37 116.9(3) . . ?
C33 C32 Pt1 128.8(2) . . ?
C37 C32 Pt1 114.1(2) . . ?
C34 C33 C32 121.7(3) . . ?
C34 C33 H33 119.1 . . ?
C32 C33 H33 119.1 . . ?
C35 C34 C33 120.4(3) . . ?
C35 C34 H34 119.8 . . ?
C33 C34 H34 119.8 . . ?
C34 C35 C36 119.4(3) . . ?
C34 C35 H35 120.3 . . ?
C36 C35 H35 120.3 . . ?
C35 C36 C37 120.2(3) . . ?
C35 C36 H36 119.9 . . ?
C37 C36 H36 119.9 . . ?
C36 C37 C32 121.4(3) . . ?
C36 C37 C38 121.5(3) . . ?
C32 C37 C38 117.1(3) . . ?
N1 C38 C42 120.8(3) . . ?
N1 C38 C37 114.0(3) . . ?
C42 C38 C37 125.2(3) . . ?
N1 C39 C40 123.4(3) . . ?
N1 C39 H39 118.3 . . ?
C40 C39 H39 118.3 . . ?
C39 C40 C41 119.4(3) . . ?
C39 C40 H40 120.3 . . ?
C41 C40 H40 120.3 . . ?
C42 C41 C40 118.2(3) . . ?
C42 C41 H41 120.9 . . ?
C40 C41 H41 120.9 . . ?
C41 C42 C38 120.6(3) . . ?
C41 C42 H42 119.7 . . ?
C38 C42 H42 119.7 . . ?
O1 C50 H50A 109.5 . . ?
O1 C50 H50B 109.5 . . ?
H50A C50 H50B 109.5 . . ?
O1 C50 H50C 109.5 . . ?
H50A C50 H50C 109.5 . . ?
H50B C50 H50C 109.5 . . ?

loop_
_geom_torsion_atom_site_label_1
_geom_torsion_atom_site_label_2
_geom_torsion_atom_site_label_3
_geom_torsion_atom_site_label_4
_geom_torsion
_geom_torsion_site_symmetry_1
_geom_torsion_site_symmetry_2
_geom_torsion_site_symmetry_3
_geom_torsion_site_symmetry_4
_geom_torsion_publ_flag
C1 Pt1 P1 C19 -1.04(14) . . . . ?
N1 Pt1 P1 C19 179.02(13) . . . . ?
C1 Pt1 P1 C7 115.18(13) . . . . ?
N1 Pt1 P1 C7 -64.76(12) . . . . ?
C1 Pt1 P1 C13 -121.93(14) . . . . ?
N1 Pt1 P1 C13 58.14(13) . . . . ?
C1 Pt1 N1 C39 171.5(5) . . . . ?
C32 Pt1 N1 C39 176.8(3) . . . . ?
P1 Pt1 N1 C39 -8.8(3) . . . . ?
C1 Pt1 N1 C38 -8.9(7) . . . . ?
C32 Pt1 N1 C38 -3.7(2) . . . . ?
P1 Pt1 N1 C38 170.76(19) . . . . ?
C32 Pt1 C1 C2 88.1(3) . . . . ?
N1 Pt1 C1 C2 93.3(6) . . . . ?
P1 Pt1 C1 C2 -86.4(2) . . . . ?
C32 Pt1 C1 C6 -84.0(2) . . . . ?
N1 Pt1 C1 C6 -78.9(7) . . . . ?
P1 Pt1 C1 C6 101.4(2) . . . . ?
C6 C1 C2 C3 2.2(4) . . . . ?
Pt1 C1 C2 C3 -170.4(2) . . . . ?
C1 C2 C3 C4 -0.3(5) . . . . ?
C50 O1 C4 C3 2.4(5) . . . . ?
C50 O1 C4 C5 -178.1(3) . . . . ?
C2 C3 C4 O1 178.1(3) . . . . ?
C2 C3 C4 C5 -1.3(5) . . . . ?
O1 C4 C5 C6 -178.5(3) . . . . ?
C3 C4 C5 C6 1.0(5) . . . . ?
C4 C5 C6 C1 1.0(5) . . . . ?
C2 C1 C6 C5 -2.5(4) . . . . ?
Pt1 C1 C6 C5 170.2(2) . . . . ?
C19 P1 C7 C8 -46.6(3) . . . . ?
C13 P1 C7 C8 61.0(3) . . . . ?
Pt1 P1 C7 C8 -172.7(2) . . . . ?
C19 P1 C7 C12 129.8(2) . . . . ?
C13 P1 C7 C12 -122.6(2) . . . . ?
Pt1 P1 C7 C12 3.7(3) . . . . ?
C12 C7 C8 C9 1.5(4) . . . . ?
P1 C7 C8 C9 177.9(2) . . . . ?
C7 C8 C9 C10 -1.8(5) . . . . ?
C8 C9 C10 C11 1.0(5) . . . . ?
C9 C10 C11 C12 0.1(5) . . . . ?
C10 C11 C12 C7 -0.4(5) . . . . ?
C8 C7 C12 C11 -0.4(4) . . . . ?
P1 C7 C12 C11 -177.0(2) . . . . ?
C19 P1 C13 C14 70.9(3) . . . . ?
C7 P1 C13 C14 -35.8(3) . . . . ?
Pt1 P1 C13 C14 -160.1(2) . . . . ?
C19 P1 C13 C18 -104.1(3) . . . . ?
C7 P1 C13 C18 149.2(2) . . . . ?
Pt1 P1 C13 C18 25.0(3) . . . . ?
C18 C13 C14 C15 0.0(5) . . . . ?
P1 C13 C14 C15 -174.8(3) . . . . ?
C13 C14 C15 C16 0.9(5) . . . . ?
C14 C15 C16 C17 -1.3(5) . . . . ?
C15 C16 C17 C18 0.7(5) . . . . ?
C16 C17 C18 C13 0.2(5) . . . . ?
C14 C13 C18 C17 -0.6(5) . . . . ?
P1 C13 C18 C17 174.7(3) . . . . ?
C7 P1 C19 P2 168.31(15) . . . . ?
C13 P1 C19 P2 56.35(19) . . . . ?
Pt1 P1 C19 P2 -70.47(17) . . . . ?
C20 P2 C19 P1 155.83(16) . . . . ?
C26 P2 C19 P1 -100.79(18) . . . . ?
C26 P2 C20 C21 -131.8(3) . . . . ?
C19 P2 C20 C21 -27.8(3) . . . . ?
C26 P2 C20 C25 54.7(3) . . . . ?
C19 P2 C20 C25 158.8(3) . . . . ?
C25 C20 C21 C22 0.7(5) . . . . ?
P2 C20 C21 C22 -172.8(3) . . . . ?
C20 C21 C22 C23 -0.3(5) . . . . ?
C21 C22 C23 C24 -0.2(6) . . . . ?
C22 C23 C24 C25 0.4(8) . . . . ?
C23 C24 C25 C20 0.0(8) . . . . ?
C21 C20 C25 C24 -0.5(7) . . . . ?
P2 C20 C25 C24 173.5(4) . . . . ?
C20 P2 C26 C27 -123.2(3) . . . . ?
C19 P2 C26 C27 132.9(3) . . . . ?
C20 P2 C26 C31 56.3(3) . . . . ?
C19 P2 C26 C31 -47.6(3) . . . . ?
C31 C26 C27 C28 -0.6(5) . . . . ?
P2 C26 C27 C28 179.0(3) . . . . ?
C26 C27 C28 C29 0.4(5) . . . . ?
C27 C28 C29 C30 0.2(5) . . . . ?
C28 C29 C30 C31 -0.6(5) . . . . ?
C29 C30 C31 C26 0.4(5) . . . . ?
C27 C26 C31 C30 0.2(5) . . . . ?
P2 C26 C31 C30 -179.3(2) . . . . ?
C1 Pt1 C32 C33 -0.1(3) . . . . ?
N1 Pt1 C32 C33 -179.1(3) . . . . ?
C1 Pt1 C32 C37 -175.9(2) . . . . ?
N1 Pt1 C32 C37 5.0(2) . . . . ?
C37 C32 C33 C34 0.8(4) . . . . ?
Pt1 C32 C33 C34 -175.0(2) . . . . ?
C32 C33 C34 C35 0.4(5) . . . . ?
C33 C34 C35 C36 -1.1(5) . . . . ?
C34 C35 C36 C37 0.5(5) . . . . ?
C35 C36 C37 C32 0.8(5) . . . . ?
C35 C36 C37 C38 -178.4(3) . . . . ?
C33 C32 C37 C36 -1.4(4) . . . . ?
Pt1 C32 C37 C36 175.0(2) . . . . ?
C33 C32 C37 C38 177.8(3) . . . . ?
Pt1 C32 C37 C38 -5.8(3) . . . . ?
C39 N1 C38 C42 0.4(4) . . . . ?
Pt1 N1 C38 C42 -179.2(2) . . . . ?
C39 N1 C38 C37 -178.7(3) . . . . ?
Pt1 N1 C38 C37 1.7(3) . . . . ?
C36 C37 C38 N1 -178.2(3) . . . . ?
C32 C37 C38 N1 2.7(4) . . . . ?
C36 C37 C38 C42 2.7(5) . . . . ?
C32 C37 C38 C42 -176.5(3) . . . . ?
C38 N1 C39 C40 -0.7(5) . . . . ?
Pt1 N1 C39 C40 178.9(2) . . . . ?
N1 C39 C40 C41 0.6(5) . . . . ?
C39 C40 C41 C42 -0.2(5) . . . . ?
C40 C41 C42 C38 0.0(5) . . . . ?
N1 C38 C42 C41 -0.1(5) . . . . ?
C37 C38 C42 C41 178.9(3) . . . . ?

_diffrn_measured_fraction_theta_max 1.000
_diffrn_reflns_theta_full        26.73
_diffrn_measured_fraction_theta_full 1.000
_refine_diff_density_max         0.452
_refine_diff_density_min         -0.486
_refine_diff_density_rms         0.101

#===END

 
data_4a
_publ_contact_author_name        Puddephatt
_publ_contact_author_address     'University of Western Ontatio'
_publ_contact_author_email       pudd@uwo.ca
_publ_contact_author_phone       519-661-2111
_publ_contact_author_fax         519-661-3022
loop_
_publ_author_name
_publ_author_address
'Puddephatt, R.J.' 'University of Western Ontatio'

_audit_creation_method           SHELXL-97
_chemical_name_systematic        
; 
 ? 
;
_chemical_name_common            ?
_chemical_melting_point          ?
_chemical_formula_moiety         'C45 H37 N P2 Pt'
_chemical_formula_sum            'C90 H74 N2 P4 Pt2'
_chemical_formula_weight         1697.57

loop_
_atom_type_symbol
_atom_type_description
_atom_type_scat_dispersion_real
_atom_type_scat_dispersion_imag
_atom_type_scat_source
C C 0.0033 0.0016 'International Tables Vol C Tables 4.2.6.8 and 6.1.1.4'
H H 0.0000 0.0000 'International Tables Vol C Tables 4.2.6.8 and 6.1.1.4'
N N 0.0061 0.0033 'International Tables Vol C Tables 4.2.6.8 and 6.1.1.4'
P P 0.1023 0.0942 'International Tables Vol C Tables 4.2.6.8 and 6.1.1.4'
Pt Pt -1.7033 8.3905 'International Tables Vol C Tables 4.2.6.8 and 6.1.1.4'

_symmetry_cell_setting           Triclinic
_symmetry_space_group_name_H-M   P-1
_symmetry_space_group_name_Hall  '-P 1'
loop_
_symmetry_equiv_pos_as_xyz
'x, y, z'
'-x, -y, -z'

_cell_length_a                   9.2470(3)
_cell_length_b                   9.8227(4)
_cell_length_c                   19.3364(7)
_cell_angle_alpha                90.239(2)
_cell_angle_beta                 90.210(2)
_cell_angle_gamma                93.781(2)
_cell_volume                     1752.48(11)
_cell_formula_units_Z            1
_cell_measurement_temperature    150(2)
_cell_measurement_reflns_used    9885
_cell_measurement_theta_min      2.33
_cell_measurement_theta_max      32.21

_exptl_crystal_description       block
_exptl_crystal_colour            yellow
_exptl_crystal_size_max          0.13
_exptl_crystal_size_mid          0.11
_exptl_crystal_size_min          0.08
_exptl_crystal_density_meas      ?
_exptl_crystal_density_diffrn    1.609
_exptl_crystal_density_method    'not measured'
_exptl_crystal_F_000             844
_exptl_absorpt_coefficient_mu    4.129
_exptl_absorpt_correction_type   multi-scan
_exptl_absorpt_correction_T_min  0.6159
_exptl_absorpt_correction_T_max  0.7336
_exptl_absorpt_process_details   ?

_exptl_special_details           
; 
 ? 
;

_diffrn_ambient_temperature      150(2)
_diffrn_radiation_wavelength     0.71073
_diffrn_radiation_type           MoK\a
_diffrn_radiation_source         'fine-focus sealed tube'
_diffrn_radiation_monochromator  graphite
_diffrn_measurement_device_type  'Bruker APEX-II CCD'
_diffrn_measurement_method       '\f and \w scans'
_diffrn_detector_area_resol_mean ?
_diffrn_reflns_number            21342
_diffrn_reflns_av_R_equivalents  0.0286
_diffrn_reflns_av_sigmaI/netI    0.0256
_diffrn_reflns_limit_h_min       -10
_diffrn_reflns_limit_h_max       11
_diffrn_reflns_limit_k_min       -11
_diffrn_reflns_limit_k_max       11
_diffrn_reflns_limit_l_min       -23
_diffrn_reflns_limit_l_max       23
_diffrn_reflns_theta_min         2.08
_diffrn_reflns_theta_max         25.03
_reflns_number_total             6199
_reflns_number_gt                5908
_reflns_threshold_expression     >2sigma(I)

_computing_data_collection       'Bruker APEX2'
_computing_cell_refinement       'Bruker SAINT'
_computing_data_reduction        'Bruker SAINT'
_computing_structure_solution    'SHELXS-97 (Sheldrick, 2008)'
_computing_structure_refinement  'SHELXL-97 (Sheldrick, 2008)'
_computing_molecular_graphics    'Bruker SHELXTL'
_computing_publication_material  'Bruker SHELXTL'

_refine_special_details          
; 
 Refinement of F^2^ against ALL reflections.  The weighted R-factor wR and 
 goodness of fit S are based on F^2^, conventional R-factors R are based 
 on F, with F set to zero for negative F^2^. The threshold expression of 
 F^2^ > 2sigma(F^2^) is used only for calculating R-factors(gt) etc. and is 
 not relevant to the choice of reflections for refinement.  R-factors based 
 on F^2^ are statistically about twice as large as those based on F, and R- 
 factors based on ALL data will be even larger. 
;

_refine_ls_structure_factor_coef Fsqd
_refine_ls_matrix_type           full
_refine_ls_weighting_scheme      calc
_refine_ls_weighting_details     
'calc w=1/[\s^2^(Fo^2^)+(0.0290P)^2^+0.1751P] where P=(Fo^2^+2Fc^2^)/3'
_atom_sites_solution_primary     direct
_atom_sites_solution_secondary   difmap
_atom_sites_solution_hydrogens   geom
_refine_ls_hydrogen_treatment    constr
_refine_ls_extinction_method     none
_refine_ls_extinction_coef       ?
_refine_ls_number_reflns         6199
_refine_ls_number_parameters     442
_refine_ls_number_restraints     0
_refine_ls_R_factor_all          0.0174
_refine_ls_R_factor_gt           0.0159
_refine_ls_wR_factor_ref         0.0445
_refine_ls_wR_factor_gt          0.0436
_refine_ls_goodness_of_fit_ref   1.000
_refine_ls_restrained_S_all      1.000
_refine_ls_shift/su_max          0.003
_refine_ls_shift/su_mean         0.000

loop_
_atom_site_label
_atom_site_type_symbol
_atom_site_fract_x
_atom_site_fract_y
_atom_site_fract_z
_atom_site_U_iso_or_equiv
_atom_site_adp_type
_atom_site_occupancy
_atom_site_symmetry_multiplicity
_atom_site_calc_flag
_atom_site_refinement_flags
_atom_site_disorder_assembly
_atom_site_disorder_group
Pt1 Pt 0.656489(8) 0.409579(8) 0.188792(4) 0.01559(4) Uani 1 1 d . . .
P1 P 0.54272(6) 0.60017(6) 0.22416(3) 0.01663(12) Uani 1 1 d . . .
P2 P 0.37387(6) 0.49887(6) 0.35345(3) 0.02106(13) Uani 1 1 d . . .
N1 N 0.8499(2) 0.5140(2) 0.15043(10) 0.0185(4) Uani 1 1 d . . .
C1 C 0.8992(2) 0.6448(2) 0.15804(13) 0.0218(5) Uani 1 1 d . . .
H1 H 0.8422 0.7042 0.1836 0.026 Uiso 1 1 calc R . .
C2 C 1.0297(3) 0.6978(3) 0.13038(13) 0.0242(5) Uani 1 1 d . . .
H2 H 1.0610 0.7908 0.1379 0.029 Uiso 1 1 calc R . .
C3 C 1.1129(2) 0.6147(2) 0.09208(12) 0.0230(5) Uani 1 1 d . . .
H3 H 1.2010 0.6501 0.0719 0.028 Uiso 1 1 calc R . .
C4 C 1.0663(2) 0.4773(2) 0.08317(12) 0.0198(5) Uani 1 1 d . . .
C5 C 0.9351(2) 0.4298(2) 0.11447(11) 0.0174(5) Uani 1 1 d . . .
C6 C 0.8848(2) 0.2889(2) 0.11185(11) 0.0177(5) Uani 1 1 d . . .
C7 C 0.7554(2) 0.2484(2) 0.14794(12) 0.0184(5) Uani 1 1 d . . .
C8 C 0.7160(3) 0.1095(2) 0.14814(12) 0.0219(5) Uani 1 1 d . . .
H8 H 0.6298 0.0775 0.1712 0.026 Uiso 1 1 calc R . .
C9 C 0.8004(3) 0.0150(2) 0.11502(12) 0.0242(5) Uani 1 1 d . . .
H9 H 0.7709 -0.0794 0.1169 0.029 Uiso 1 1 calc R . .
C10 C 0.9247(3) 0.0561(3) 0.08002(13) 0.0246(5) Uani 1 1 d . . .
H10 H 0.9803 -0.0096 0.0581 0.030 Uiso 1 1 calc R . .
C11 C 0.9696(2) 0.1960(2) 0.07661(12) 0.0206(5) Uani 1 1 d . . .
C12 C 1.0988(3) 0.2473(3) 0.04187(12) 0.0239(5) Uani 1 1 d . . .
H12 H 1.1533 0.1861 0.0161 0.029 Uiso 1 1 calc R . .
C13 C 1.1446(3) 0.3810(3) 0.04505(12) 0.0227(5) Uani 1 1 d . . .
H13 H 1.2306 0.4115 0.0215 0.027 Uiso 1 1 calc R . .
C14 C 0.4977(2) 0.7057(2) 0.14987(12) 0.0187(5) Uani 1 1 d . . .
C15 C 0.4219(2) 0.8240(2) 0.15530(13) 0.0230(5) Uani 1 1 d . . .
H15 H 0.3961 0.8565 0.1996 0.028 Uiso 1 1 calc R . .
C16 C 0.3844(3) 0.8941(2) 0.09636(14) 0.0265(6) Uani 1 1 d . . .
H16 H 0.3349 0.9755 0.1006 0.032 Uiso 1 1 calc R . .
C17 C 0.4186(3) 0.8460(3) 0.03153(14) 0.0288(6) Uani 1 1 d . . .
H17 H 0.3919 0.8939 -0.0086 0.035 Uiso 1 1 calc R . .
C18 C 0.4917(3) 0.7284(3) 0.02514(13) 0.0271(6) Uani 1 1 d . . .
H18 H 0.5142 0.6947 -0.0194 0.033 Uiso 1 1 calc R . .
C19 C 0.5323(2) 0.6595(2) 0.08396(12) 0.0216(5) Uani 1 1 d . . .
H19 H 0.5843 0.5798 0.0793 0.026 Uiso 1 1 calc R . .
C20 C 0.3654(2) 0.5772(3) 0.26640(12) 0.0217(5) Uani 1 1 d . . .
H20A H 0.2994 0.5188 0.2367 0.026 Uiso 1 1 calc R . .
H20B H 0.3238 0.6672 0.2708 0.026 Uiso 1 1 calc R . .
C21 C 0.3708(3) 0.6507(3) 0.40959(13) 0.0251(5) Uani 1 1 d . . .
C22 C 0.4784(3) 0.6673(3) 0.46037(14) 0.0338(6) Uani 1 1 d . . .
H22 H 0.5518 0.6042 0.4632 0.041 Uiso 1 1 calc R . .
C23 C 0.4788(4) 0.7762(3) 0.50695(15) 0.0460(8) Uani 1 1 d . . .
H23 H 0.5514 0.7865 0.5418 0.055 Uiso 1 1 calc R . .
C24 C 0.3741(4) 0.8682(3) 0.50238(16) 0.0486(9) Uani 1 1 d . . .
H24 H 0.3747 0.9426 0.5340 0.058 Uiso 1 1 calc R . .
C25 C 0.2680(4) 0.8533(3) 0.45211(17) 0.0432(8) Uani 1 1 d . . .
H25 H 0.1963 0.9180 0.4490 0.052 Uiso 1 1 calc R . .
C26 C 0.2653(3) 0.7449(3) 0.40627(15) 0.0337(6) Uani 1 1 d . . .
H26 H 0.1908 0.7347 0.3723 0.040 Uiso 1 1 calc R . .
C27 C 0.1848(3) 0.4297(3) 0.36377(13) 0.0232(5) Uani 1 1 d . . .
C28 C 0.1373(3) 0.4009(4) 0.42962(16) 0.0635(12) Uani 1 1 d . . .
H28 H 0.2004 0.4224 0.4676 0.076 Uiso 1 1 calc R . .
C29 C 0.0001(4) 0.3416(5) 0.44219(16) 0.0707(13) Uani 1 1 d . . .
H29 H -0.0304 0.3248 0.4884 0.085 Uiso 1 1 calc R . .
C30 C -0.0922(3) 0.3070(3) 0.38829(14) 0.0368(7) Uani 1 1 d . . .
H30 H -0.1856 0.2643 0.3968 0.044 Uiso 1 1 calc R . .
C31 C -0.0479(3) 0.3347(3) 0.32251(15) 0.0337(6) Uani 1 1 d . . .
H31 H -0.1110 0.3119 0.2847 0.040 Uiso 1 1 calc R . .
C32 C 0.0894(3) 0.3963(3) 0.31037(14) 0.0321(6) Uani 1 1 d . . .
H32 H 0.1181 0.4159 0.2642 0.038 Uiso 1 1 calc R . .
C33 C 0.6537(2) 0.7063(2) 0.28519(12) 0.0200(5) Uani 1 1 d . . .
C34 C 0.6544(3) 0.8473(3) 0.29149(14) 0.0283(6) Uani 1 1 d . . .
H34 H 0.5937 0.8969 0.2625 0.034 Uiso 1 1 calc R . .
C35 C 0.7433(3) 0.9157(3) 0.33978(15) 0.0383(7) Uani 1 1 d . . .
H35 H 0.7436 1.0121 0.3437 0.046 Uiso 1 1 calc R . .
C36 C 0.8316(3) 0.8447(3) 0.38231(15) 0.0374(7) Uani 1 1 d . . .
H36 H 0.8917 0.8920 0.4157 0.045 Uiso 1 1 calc R . .
C37 C 0.8321(3) 0.7050(3) 0.37608(14) 0.0363(7) Uani 1 1 d . . .
H37 H 0.8934 0.6559 0.4050 0.044 Uiso 1 1 calc R . .
C38 C 0.7439(3) 0.6362(3) 0.32793(13) 0.0284(6) Uani 1 1 d . . .
H38 H 0.7449 0.5398 0.3240 0.034 Uiso 1 1 calc R . .
C39 C 0.4903(2) 0.2835(2) 0.21967(12) 0.0186(5) Uani 1 1 d . . .
C40 C 0.3631(3) 0.2623(3) 0.18064(13) 0.0252(5) Uani 1 1 d . . .
H40 H 0.3539 0.3119 0.1390 0.030 Uiso 1 1 calc R . .
C41 C 0.2499(3) 0.1715(3) 0.20050(14) 0.0296(6) Uani 1 1 d . . .
H41 H 0.1660 0.1607 0.1720 0.036 Uiso 1 1 calc R . .
C42 C 0.2556(3) 0.0963(3) 0.26045(14) 0.0268(6) Uani 1 1 d . . .
C43 C 0.1297(3) 0.0022(3) 0.28234(17) 0.0431(7) Uani 1 1 d . . .
H43A H 0.0753 0.0458 0.3182 0.052 Uiso 1 1 d R . .
H43B H 0.1651 -0.0834 0.2999 0.052 Uiso 1 1 d R . .
H43C H 0.0655 -0.0195 0.2422 0.052 Uiso 1 1 d R . .
C44 C 0.3819(3) 0.1145(3) 0.30002(13) 0.0259(5) Uani 1 1 d . . .
H44 H 0.3905 0.0633 0.3412 0.031 Uiso 1 1 calc R . .
C45 C 0.4949(3) 0.2055(2) 0.28048(13) 0.0239(5) Uani 1 1 d . . .
H45 H 0.5786 0.2158 0.3092 0.029 Uiso 1 1 calc R . .

loop_
_atom_site_aniso_label
_atom_site_aniso_U_11
_atom_site_aniso_U_22
_atom_site_aniso_U_33
_atom_site_aniso_U_23
_atom_site_aniso_U_13
_atom_site_aniso_U_12
Pt1 0.01519(6) 0.01505(6) 0.01647(6) 0.00131(4) 0.00186(4) 0.00038(4)
P1 0.0171(3) 0.0172(3) 0.0157(3) 0.0011(2) 0.0027(2) 0.0013(2)
P2 0.0206(3) 0.0236(3) 0.0190(3) 0.0031(3) 0.0026(2) 0.0006(3)
N1 0.0184(10) 0.0179(10) 0.0192(10) 0.0018(8) 0.0012(8) 0.0011(8)
C1 0.0211(12) 0.0170(12) 0.0272(13) 0.0001(10) 0.0033(10) 0.0018(10)
C2 0.0240(13) 0.0172(12) 0.0310(14) 0.0019(10) 0.0005(10) -0.0029(10)
C3 0.0178(11) 0.0269(13) 0.0241(13) 0.0036(10) 0.0016(10) -0.0016(10)
C4 0.0159(11) 0.0247(13) 0.0190(12) 0.0015(10) -0.0002(9) 0.0021(10)
C5 0.0162(11) 0.0203(12) 0.0158(11) -0.0003(9) -0.0023(9) 0.0024(9)
C6 0.0191(11) 0.0195(12) 0.0147(11) 0.0015(9) -0.0028(9) 0.0022(9)
C7 0.0184(11) 0.0203(12) 0.0166(12) 0.0011(9) -0.0026(9) 0.0019(9)
C8 0.0242(12) 0.0207(12) 0.0206(12) 0.0009(10) -0.0008(10) -0.0003(10)
C9 0.0341(14) 0.0150(12) 0.0235(13) -0.0007(10) -0.0029(11) 0.0023(10)
C10 0.0317(14) 0.0218(13) 0.0215(13) -0.0046(10) -0.0004(10) 0.0100(11)
C11 0.0221(12) 0.0230(13) 0.0174(12) -0.0020(10) -0.0028(9) 0.0063(10)
C12 0.0234(12) 0.0314(14) 0.0177(12) -0.0025(10) 0.0024(10) 0.0085(11)
C13 0.0179(11) 0.0302(14) 0.0202(13) 0.0004(10) 0.0015(9) 0.0039(10)
C14 0.0168(11) 0.0183(12) 0.0205(12) 0.0022(9) 0.0006(9) -0.0022(9)
C15 0.0207(12) 0.0227(13) 0.0255(13) -0.0013(10) -0.0013(10) 0.0006(10)
C16 0.0237(12) 0.0177(12) 0.0376(15) 0.0064(11) -0.0043(11) -0.0011(10)
C17 0.0260(13) 0.0302(14) 0.0290(15) 0.0149(12) -0.0048(11) -0.0067(11)
C18 0.0237(12) 0.0383(15) 0.0190(13) 0.0042(11) 0.0043(10) -0.0018(11)
C19 0.0186(11) 0.0247(13) 0.0215(13) 0.0019(10) 0.0040(9) 0.0019(10)
C20 0.0205(12) 0.0289(14) 0.0160(12) 0.0014(10) 0.0042(9) 0.0034(10)
C21 0.0273(13) 0.0268(13) 0.0204(13) 0.0015(10) 0.0069(10) -0.0038(11)
C22 0.0368(15) 0.0351(16) 0.0283(15) 0.0004(12) 0.0028(12) -0.0076(12)
C23 0.0531(19) 0.052(2) 0.0301(17) -0.0056(14) 0.0013(14) -0.0191(16)
C24 0.068(2) 0.0331(17) 0.0417(19) -0.0137(14) 0.0290(17) -0.0211(16)
C25 0.0495(19) 0.0313(16) 0.049(2) 0.0012(14) 0.0266(16) 0.0018(14)
C26 0.0343(15) 0.0327(15) 0.0340(16) 0.0017(12) 0.0115(12) -0.0010(12)
C27 0.0231(12) 0.0240(13) 0.0225(13) 0.0037(10) 0.0029(10) 0.0001(10)
C28 0.0442(18) 0.118(3) 0.0220(16) 0.0153(18) -0.0076(13) -0.043(2)
C29 0.049(2) 0.133(4) 0.0238(17) 0.019(2) 0.0018(14) -0.046(2)
C30 0.0273(14) 0.0481(18) 0.0330(16) 0.0049(13) 0.0033(12) -0.0133(13)
C31 0.0275(14) 0.0422(17) 0.0304(15) 0.0007(12) -0.0035(11) -0.0062(12)
C32 0.0311(14) 0.0428(17) 0.0213(14) 0.0000(12) 0.0061(11) -0.0055(12)
C33 0.0171(11) 0.0256(13) 0.0170(12) -0.0009(10) 0.0045(9) -0.0006(10)
C34 0.0304(14) 0.0275(14) 0.0268(14) -0.0023(11) -0.0005(11) -0.0002(11)
C35 0.0455(17) 0.0327(16) 0.0353(16) -0.0102(13) -0.0036(13) -0.0061(13)
C36 0.0312(14) 0.0523(19) 0.0268(15) -0.0094(13) -0.0011(11) -0.0121(13)
C37 0.0280(14) 0.0523(19) 0.0280(15) 0.0036(13) -0.0061(11) -0.0007(13)
C38 0.0272(13) 0.0306(14) 0.0275(14) 0.0000(11) -0.0001(11) 0.0022(11)
C39 0.0171(11) 0.0170(12) 0.0216(12) -0.0030(9) 0.0039(9) -0.0004(9)
C40 0.0231(12) 0.0309(14) 0.0212(13) 0.0057(11) -0.0004(10) -0.0013(11)
C41 0.0222(13) 0.0349(15) 0.0310(15) 0.0020(12) -0.0048(11) -0.0043(11)
C42 0.0251(13) 0.0217(13) 0.0332(15) 0.0003(11) 0.0077(11) -0.0023(10)
C43 0.0327(15) 0.0431(18) 0.052(2) 0.0105(15) 0.0063(14) -0.0104(14)
C44 0.0335(13) 0.0237(13) 0.0207(13) 0.0063(10) 0.0045(10) 0.0021(11)
C45 0.0214(12) 0.0247(13) 0.0254(13) 0.0058(10) -0.0022(10) -0.0001(10)

_geom_special_details            
; 
 All esds (except the esd in the dihedral angle between two l.s. planes) 
 are estimated using the full covariance matrix.  The cell esds are taken 
 into account individually in the estimation of esds in distances, angles 
 and torsion angles; correlations between esds in cell parameters are only 
 used when they are defined by crystal symmetry.  An approximate (isotropic) 
 treatment of cell esds is used for estimating esds involving l.s. planes. 
;

loop_
_geom_bond_atom_site_label_1
_geom_bond_atom_site_label_2
_geom_bond_distance
_geom_bond_site_symmetry_2
_geom_bond_publ_flag
Pt1 C39 2.003(2) . ?
Pt1 C7 2.038(2) . ?
Pt1 N1 2.1390(19) . ?
Pt1 P1 2.3095(6) . ?
P1 C33 1.836(2) . ?
P1 C14 1.838(2) . ?
P1 C20 1.836(2) . ?
P2 C21 1.843(3) . ?
P2 C27 1.845(2) . ?
P2 C20 1.857(2) . ?
N1 C1 1.342(3) . ?
N1 C5 1.369(3) . ?
C1 C2 1.392(3) . ?
C1 H1 0.9500 . ?
C2 C3 1.375(3) . ?
C2 H2 0.9500 . ?
C3 C4 1.399(3) . ?
C3 H3 0.9500 . ?
C4 C5 1.410(3) . ?
C4 C13 1.433(3) . ?
C5 C6 1.432(3) . ?
C6 C11 1.416(3) . ?
C6 C7 1.422(3) . ?
C7 C8 1.389(3) . ?
C8 C9 1.405(3) . ?
C8 H8 0.9500 . ?
C9 C10 1.374(4) . ?
C9 H9 0.9500 . ?
C10 C11 1.411(3) . ?
C10 H10 0.9500 . ?
C11 C12 1.436(3) . ?
C12 C13 1.354(4) . ?
C12 H12 0.9500 . ?
C13 H13 0.9500 . ?
C14 C15 1.399(3) . ?
C14 C19 1.396(3) . ?
C15 C16 1.389(3) . ?
C15 H15 0.9500 . ?
C16 C17 1.383(4) . ?
C16 H16 0.9500 . ?
C17 C18 1.382(4) . ?
C17 H17 0.9500 . ?
C18 C19 1.389(3) . ?
C18 H18 0.9500 . ?
C19 H19 0.9500 . ?
C20 H20A 0.9900 . ?
C20 H20B 0.9900 . ?
C21 C26 1.390(4) . ?
C21 C22 1.397(4) . ?
C22 C23 1.395(4) . ?
C22 H22 0.9500 . ?
C23 C24 1.370(5) . ?
C23 H23 0.9500 . ?
C24 C25 1.380(5) . ?
C24 H24 0.9500 . ?
C25 C26 1.382(4) . ?
C25 H25 0.9500 . ?
C26 H26 0.9500 . ?
C27 C28 1.373(4) . ?
C27 C32 1.380(4) . ?
C28 C29 1.384(4) . ?
C28 H28 0.9500 . ?
C29 C30 1.372(4) . ?
C29 H29 0.9500 . ?
C30 C31 1.361(4) . ?
C30 H30 0.9500 . ?
C31 C32 1.391(4) . ?
C31 H31 0.9500 . ?
C32 H32 0.9500 . ?
C33 C34 1.389(4) . ?
C33 C38 1.389(3) . ?
C34 C35 1.384(4) . ?
C34 H34 0.9500 . ?
C35 C36 1.379(4) . ?
C35 H35 0.9500 . ?
C36 C37 1.377(4) . ?
C36 H36 0.9500 . ?
C37 C38 1.381(4) . ?
C37 H37 0.9500 . ?
C38 H38 0.9500 . ?
C39 C40 1.399(3) . ?
C39 C45 1.408(3) . ?
C40 C41 1.386(3) . ?
C40 H40 0.9500 . ?
C41 C42 1.380(4) . ?
C41 H41 0.9500 . ?
C42 C44 1.395(4) . ?
C42 C43 1.501(4) . ?
C43 H43A 0.9722 . ?
C43 H43B 0.9841 . ?
C43 H43C 0.9885 . ?
C44 C45 1.385(3) . ?
C44 H44 0.9500 . ?
C45 H45 0.9500 . ?

loop_
_geom_angle_atom_site_label_1
_geom_angle_atom_site_label_2
_geom_angle_atom_site_label_3
_geom_angle
_geom_angle_site_symmetry_1
_geom_angle_site_symmetry_3
_geom_angle_publ_flag
C39 Pt1 C7 90.12(9) . . ?
C39 Pt1 N1 170.46(8) . . ?
C7 Pt1 N1 80.37(8) . . ?
C39 Pt1 P1 92.29(7) . . ?
C7 Pt1 P1 174.38(6) . . ?
N1 Pt1 P1 97.24(5) . . ?
C33 P1 C14 108.59(11) . . ?
C33 P1 C20 104.15(11) . . ?
C14 P1 C20 100.77(10) . . ?
C33 P1 Pt1 112.37(8) . . ?
C14 P1 Pt1 111.04(8) . . ?
C20 P1 Pt1 118.92(9) . . ?
C21 P2 C27 99.62(11) . . ?
C21 P2 C20 101.14(11) . . ?
C27 P2 C20 100.99(11) . . ?
C1 N1 C5 117.29(19) . . ?
C1 N1 Pt1 130.01(16) . . ?
C5 N1 Pt1 112.67(15) . . ?
N1 C1 C2 123.3(2) . . ?
N1 C1 H1 118.3 . . ?
C2 C1 H1 118.3 . . ?
C3 C2 C1 119.5(2) . . ?
C3 C2 H2 120.3 . . ?
C1 C2 H2 120.3 . . ?
C2 C3 C4 119.2(2) . . ?
C2 C3 H3 120.4 . . ?
C4 C3 H3 120.4 . . ?
C3 C4 C5 118.2(2) . . ?
C3 C4 C13 124.1(2) . . ?
C5 C4 C13 117.7(2) . . ?
N1 C5 C4 122.5(2) . . ?
N1 C5 C6 115.8(2) . . ?
C4 C5 C6 121.6(2) . . ?
C11 C6 C7 123.3(2) . . ?
C11 C6 C5 118.6(2) . . ?
C7 C6 C5 118.0(2) . . ?
C8 C7 C6 116.1(2) . . ?
C8 C7 Pt1 131.13(18) . . ?
C6 C7 Pt1 112.71(17) . . ?
C7 C8 C9 121.6(2) . . ?
C7 C8 H8 119.2 . . ?
C9 C8 H8 119.2 . . ?
C10 C9 C8 121.5(2) . . ?
C10 C9 H9 119.2 . . ?
C8 C9 H9 119.2 . . ?
C9 C10 C11 119.9(2) . . ?
C9 C10 H10 120.0 . . ?
C11 C10 H10 120.0 . . ?
C10 C11 C6 117.6(2) . . ?
C10 C11 C12 123.4(2) . . ?
C6 C11 C12 118.9(2) . . ?
C13 C12 C11 121.4(2) . . ?
C13 C12 H12 119.3 . . ?
C11 C12 H12 119.3 . . ?
C12 C13 C4 121.5(2) . . ?
C12 C13 H13 119.3 . . ?
C4 C13 H13 119.3 . . ?
C15 C14 C19 118.3(2) . . ?
C15 C14 P1 123.73(18) . . ?
C19 C14 P1 117.76(17) . . ?
C16 C15 C14 120.4(2) . . ?
C16 C15 H15 119.8 . . ?
C14 C15 H15 119.8 . . ?
C17 C16 C15 120.3(2) . . ?
C17 C16 H16 119.9 . . ?
C15 C16 H16 119.9 . . ?
C18 C17 C16 120.0(2) . . ?
C18 C17 H17 120.0 . . ?
C16 C17 H17 120.0 . . ?
C17 C18 C19 119.9(2) . . ?
C17 C18 H18 120.1 . . ?
C19 C18 H18 120.1 . . ?
C18 C19 C14 121.0(2) . . ?
C18 C19 H19 119.5 . . ?
C14 C19 H19 119.5 . . ?
P1 C20 P2 113.37(12) . . ?
P1 C20 H20A 108.9 . . ?
P2 C20 H20A 108.9 . . ?
P1 C20 H20B 108.9 . . ?
P2 C20 H20B 108.9 . . ?
H20A C20 H20B 107.7 . . ?
C26 C21 C22 118.7(3) . . ?
C26 C21 P2 124.1(2) . . ?
C22 C21 P2 117.1(2) . . ?
C21 C22 C23 120.3(3) . . ?
C21 C22 H22 119.8 . . ?
C23 C22 H22 119.8 . . ?
C24 C23 C22 119.9(3) . . ?
C24 C23 H23 120.0 . . ?
C22 C23 H23 120.0 . . ?
C23 C24 C25 120.3(3) . . ?
C23 C24 H24 119.9 . . ?
C25 C24 H24 119.9 . . ?
C24 C25 C26 120.4(3) . . ?
C24 C25 H25 119.8 . . ?
C26 C25 H25 119.8 . . ?
C25 C26 C21 120.4(3) . . ?
C25 C26 H26 119.8 . . ?
C21 C26 H26 119.8 . . ?
C28 C27 C32 116.9(2) . . ?
C28 C27 P2 117.6(2) . . ?
C32 C27 P2 125.36(19) . . ?
C27 C28 C29 121.8(3) . . ?
C27 C28 H28 119.1 . . ?
C29 C28 H28 119.1 . . ?
C30 C29 C28 120.4(3) . . ?
C30 C29 H29 119.8 . . ?
C28 C29 H29 119.8 . . ?
C31 C30 C29 119.0(3) . . ?
C31 C30 H30 120.5 . . ?
C29 C30 H30 120.5 . . ?
C30 C31 C32 120.3(3) . . ?
C30 C31 H31 119.9 . . ?
C32 C31 H31 119.9 . . ?
C27 C32 C31 121.6(2) . . ?
C27 C32 H32 119.2 . . ?
C31 C32 H32 119.2 . . ?
C34 C33 C38 118.7(2) . . ?
C34 C33 P1 125.80(19) . . ?
C38 C33 P1 115.45(19) . . ?
C35 C34 C33 120.2(2) . . ?
C35 C34 H34 119.9 . . ?
C33 C34 H34 119.9 . . ?
C36 C35 C34 120.4(3) . . ?
C36 C35 H35 119.8 . . ?
C34 C35 H35 119.8 . . ?
C35 C36 C37 119.7(3) . . ?
C35 C36 H36 120.2 . . ?
C37 C36 H36 120.2 . . ?
C36 C37 C38 120.2(3) . . ?
C36 C37 H37 119.9 . . ?
C38 C37 H37 119.9 . . ?
C37 C38 C33 120.7(3) . . ?
C37 C38 H38 119.6 . . ?
C33 C38 H38 119.6 . . ?
C40 C39 C45 115.0(2) . . ?
C40 C39 Pt1 122.19(18) . . ?
C45 C39 Pt1 122.76(17) . . ?
C41 C40 C39 122.4(2) . . ?
C41 C40 H40 118.8 . . ?
C39 C40 H40 118.8 . . ?
C42 C41 C40 121.9(2) . . ?
C42 C41 H41 119.0 . . ?
C40 C41 H41 119.0 . . ?
C41 C42 C44 116.9(2) . . ?
C41 C42 C43 121.1(2) . . ?
C44 C42 C43 122.1(2) . . ?
C42 C43 H43A 109.7 . . ?
C42 C43 H43B 109.8 . . ?
H43A C43 H43B 109.8 . . ?
C42 C43 H43C 109.8 . . ?
H43A C43 H43C 109.4 . . ?
H43B C43 H43C 108.4 . . ?
C45 C44 C42 121.4(2) . . ?
C45 C44 H44 119.3 . . ?
C42 C44 H44 119.3 . . ?
C44 C45 C39 122.4(2) . . ?
C44 C45 H45 118.8 . . ?
C39 C45 H45 118.8 . . ?

loop_
_geom_torsion_atom_site_label_1
_geom_torsion_atom_site_label_2
_geom_torsion_atom_site_label_3
_geom_torsion_atom_site_label_4
_geom_torsion
_geom_torsion_site_symmetry_1
_geom_torsion_site_symmetry_2
_geom_torsion_site_symmetry_3
_geom_torsion_site_symmetry_4
_geom_torsion_publ_flag
C39 Pt1 P1 C33 124.18(11) . . . . ?
C7 Pt1 P1 C33 -120.4(7) . . . . ?
N1 Pt1 P1 C33 -55.93(10) . . . . ?
C39 Pt1 P1 C14 -113.97(10) . . . . ?
C7 Pt1 P1 C14 1.5(7) . . . . ?
N1 Pt1 P1 C14 65.92(9) . . . . ?
C39 Pt1 P1 C20 2.21(11) . . . . ?
C7 Pt1 P1 C20 117.7(7) . . . . ?
N1 Pt1 P1 C20 -177.90(10) . . . . ?
C39 Pt1 N1 C1 -168.8(4) . . . . ?
C7 Pt1 N1 C1 -173.3(2) . . . . ?
P1 Pt1 N1 C1 11.8(2) . . . . ?
C39 Pt1 N1 C5 9.2(5) . . . . ?
C7 Pt1 N1 C5 4.75(15) . . . . ?
P1 Pt1 N1 C5 -170.11(14) . . . . ?
C5 N1 C1 C2 1.1(3) . . . . ?
Pt1 N1 C1 C2 179.11(17) . . . . ?
N1 C1 C2 C3 1.2(4) . . . . ?
C1 C2 C3 C4 -1.6(4) . . . . ?
C2 C3 C4 C5 -0.3(3) . . . . ?
C2 C3 C4 C13 -179.3(2) . . . . ?
C1 N1 C5 C4 -3.2(3) . . . . ?
Pt1 N1 C5 C4 178.50(16) . . . . ?
C1 N1 C5 C6 175.4(2) . . . . ?
Pt1 N1 C5 C6 -2.9(2) . . . . ?
C3 C4 C5 N1 2.8(3) . . . . ?
C13 C4 C5 N1 -178.2(2) . . . . ?
C3 C4 C5 C6 -175.7(2) . . . . ?
C13 C4 C5 C6 3.4(3) . . . . ?
N1 C5 C6 C11 -178.74(19) . . . . ?
C4 C5 C6 C11 -0.2(3) . . . . ?
N1 C5 C6 C7 -1.9(3) . . . . ?
C4 C5 C6 C7 176.7(2) . . . . ?
C11 C6 C7 C8 1.1(3) . . . . ?
C5 C6 C7 C8 -175.6(2) . . . . ?
C11 C6 C7 Pt1 -177.36(17) . . . . ?
C5 C6 C7 Pt1 6.0(3) . . . . ?
C39 Pt1 C7 C8 -3.0(2) . . . . ?
N1 Pt1 C7 C8 176.3(2) . . . . ?
P1 Pt1 C7 C8 -118.5(6) . . . . ?
C39 Pt1 C7 C6 175.16(17) . . . . ?
N1 Pt1 C7 C6 -5.58(15) . . . . ?
P1 Pt1 C7 C6 59.6(7) . . . . ?
C6 C7 C8 C9 0.6(3) . . . . ?
Pt1 C7 C8 C9 178.68(17) . . . . ?
C7 C8 C9 C10 -1.0(4) . . . . ?
C8 C9 C10 C11 -0.2(4) . . . . ?
C9 C10 C11 C6 1.8(3) . . . . ?
C9 C10 C11 C12 179.2(2) . . . . ?
C7 C6 C11 C10 -2.3(3) . . . . ?
C5 C6 C11 C10 174.4(2) . . . . ?
C7 C6 C11 C12 -179.8(2) . . . . ?
C5 C6 C11 C12 -3.1(3) . . . . ?
C10 C11 C12 C13 -174.1(2) . . . . ?
C6 C11 C12 C13 3.3(3) . . . . ?
C11 C12 C13 C4 0.0(4) . . . . ?
C3 C4 C13 C12 175.7(2) . . . . ?
C5 C4 C13 C12 -3.3(3) . . . . ?
C33 P1 C14 C15 -59.2(2) . . . . ?
C20 P1 C14 C15 49.9(2) . . . . ?
Pt1 P1 C14 C15 176.77(17) . . . . ?
C33 P1 C14 C19 125.47(18) . . . . ?
C20 P1 C14 C19 -125.46(19) . . . . ?
Pt1 P1 C14 C19 1.4(2) . . . . ?
C19 C14 C15 C16 -0.9(3) . . . . ?
P1 C14 C15 C16 -176.20(18) . . . . ?
C14 C15 C16 C17 1.5(4) . . . . ?
C15 C16 C17 C18 -0.6(4) . . . . ?
C16 C17 C18 C19 -0.8(4) . . . . ?
C17 C18 C19 C14 1.3(4) . . . . ?
C15 C14 C19 C18 -0.5(3) . . . . ?
P1 C14 C19 C18 175.09(18) . . . . ?
C33 P1 C20 P2 -57.49(16) . . . . ?
C14 P1 C20 P2 -169.98(13) . . . . ?
Pt1 P1 C20 P2 68.51(15) . . . . ?
C21 P2 C20 P1 99.46(14) . . . . ?
C27 P2 C20 P1 -158.31(14) . . . . ?
C27 P2 C21 C26 -49.3(2) . . . . ?
C20 P2 C21 C26 54.1(2) . . . . ?
C27 P2 C21 C22 127.8(2) . . . . ?
C20 P2 C21 C22 -128.9(2) . . . . ?
C26 C21 C22 C23 0.4(4) . . . . ?
P2 C21 C22 C23 -176.8(2) . . . . ?
C21 C22 C23 C24 -0.8(4) . . . . ?
C22 C23 C24 C25 0.3(5) . . . . ?
C23 C24 C25 C26 0.6(4) . . . . ?
C24 C25 C26 C21 -1.0(4) . . . . ?
C22 C21 C26 C25 0.5(4) . . . . ?
P2 C21 C26 C25 177.5(2) . . . . ?
C21 P2 C27 C28 -56.9(3) . . . . ?
C20 P2 C27 C28 -160.3(3) . . . . ?
C21 P2 C27 C32 127.4(2) . . . . ?
C20 P2 C27 C32 23.9(3) . . . . ?
C32 C27 C28 C29 -0.2(6) . . . . ?
P2 C27 C28 C29 -176.3(3) . . . . ?
C27 C28 C29 C30 1.4(7) . . . . ?
C28 C29 C30 C31 -1.5(6) . . . . ?
C29 C30 C31 C32 0.4(5) . . . . ?
C28 C27 C32 C31 -0.9(4) . . . . ?
P2 C27 C32 C31 174.9(2) . . . . ?
C30 C31 C32 C27 0.7(5) . . . . ?
C14 P1 C33 C34 25.0(2) . . . . ?
C20 P1 C33 C34 -81.8(2) . . . . ?
Pt1 P1 C33 C34 148.2(2) . . . . ?
C14 P1 C33 C38 -154.85(18) . . . . ?
C20 P1 C33 C38 98.40(19) . . . . ?
Pt1 P1 C33 C38 -31.6(2) . . . . ?
C38 C33 C34 C35 -0.3(4) . . . . ?
P1 C33 C34 C35 179.9(2) . . . . ?
C33 C34 C35 C36 -0.3(4) . . . . ?
C34 C35 C36 C37 0.7(4) . . . . ?
C35 C36 C37 C38 -0.5(4) . . . . ?
C36 C37 C38 C33 0.0(4) . . . . ?
C34 C33 C38 C37 0.4(4) . . . . ?
P1 C33 C38 C37 -179.8(2) . . . . ?
C7 Pt1 C39 C40 -96.3(2) . . . . ?
N1 Pt1 C39 C40 -100.7(5) . . . . ?
P1 Pt1 C39 C40 78.7(2) . . . . ?
C7 Pt1 C39 C45 81.0(2) . . . . ?
N1 Pt1 C39 C45 76.6(5) . . . . ?
P1 Pt1 C39 C45 -104.1(2) . . . . ?
C45 C39 C40 C41 0.1(4) . . . . ?
Pt1 C39 C40 C41 177.6(2) . . . . ?
C39 C40 C41 C42 0.2(4) . . . . ?
C40 C41 C42 C44 -0.9(4) . . . . ?
C40 C41 C42 C43 177.8(3) . . . . ?
C41 C42 C44 C45 1.1(4) . . . . ?
C43 C42 C44 C45 -177.5(3) . . . . ?
C42 C44 C45 C39 -0.8(4) . . . . ?
C40 C39 C45 C44 0.1(4) . . . . ?
Pt1 C39 C45 C44 -177.31(19) . . . . ?

_diffrn_measured_fraction_theta_max 1.000
_diffrn_reflns_theta_full        25.03
_diffrn_measured_fraction_theta_full 1.000
_refine_diff_density_max         0.577
_refine_diff_density_min         -0.488
_refine_diff_density_rms         0.064

#===END

 
data_9a
_publ_requested_journal          Organometallics
_publ_contact_author_name        Puddephatt
_publ_contact_author_address     'University of Western Ontario'
_publ_contact_author_email       pudd@uwo.ca
_publ_contact_author_phone       519-661-2111
_publ_contact_author_fax         519-661-3022
loop_
_publ_author_name
_publ_author_address
'Puddephatt, R.J.' 'University of Western Ontario'

_audit_creation_method           SHELXL-97
_chemical_name_systematic        
; 
 ? 
;
_chemical_name_common            ?
_chemical_melting_point          ?
_chemical_formula_moiety         'C63 H52 N2 P2 Pt2'
_chemical_formula_sum            'C63 H52 N2 P2 Pt2'
_chemical_formula_weight         1289.19

loop_
_atom_type_symbol
_atom_type_description
_atom_type_scat_dispersion_real
_atom_type_scat_dispersion_imag
_atom_type_scat_source
C C 0.0033 0.0016 'International Tables Vol C Tables 4.2.6.8 and 6.1.1.4'
H H 0.0000 0.0000 'International Tables Vol C Tables 4.2.6.8 and 6.1.1.4'
N N 0.0061 0.0033 'International Tables Vol C Tables 4.2.6.8 and 6.1.1.4'
P P 0.1023 0.0942 'International Tables Vol C Tables 4.2.6.8 and 6.1.1.4'
Pt Pt -1.7033 8.3905 'International Tables Vol C Tables 4.2.6.8 and 6.1.1.4'

_symmetry_cell_setting           Triclinic
_symmetry_space_group_name_H-M   P-1
_symmetry_space_group_name_Hall  '-P 1'
loop_
_symmetry_equiv_pos_as_xyz
'x, y, z'
'-x, -y, -z'

_cell_length_a                   11.595(2)
_cell_length_b                   13.699(3)
_cell_length_c                   18.152(4)
_cell_angle_alpha                96.84(3)
_cell_angle_beta                 108.61(3)
_cell_angle_gamma                111.59(3)
_cell_volume                     2447.6(13)
_cell_formula_units_Z            2
_cell_measurement_temperature    293(2)
_cell_measurement_reflns_used    ?
_cell_measurement_theta_min      2.04
_cell_measurement_theta_max      27.48

_exptl_crystal_description       plate
_exptl_crystal_colour            yellow
_exptl_crystal_size_max          0.13
_exptl_crystal_size_mid          0.07
_exptl_crystal_size_min          0.04
_exptl_crystal_density_meas      ?
_exptl_crystal_density_diffrn    1.749
_exptl_crystal_density_method    'not measured'
_exptl_crystal_F_000             1260
_exptl_absorpt_coefficient_mu    5.819
_exptl_absorpt_correction_type   multi-scan
_exptl_absorpt_correction_T_min  0.5184
_exptl_absorpt_correction_T_max  0.8006
_exptl_absorpt_process_details   'DENZO-SMN (Otwinowski & Minor, 1997)'

_exptl_special_details           
; 
 ? 
;

_diffrn_ambient_temperature      293(2)
_diffrn_radiation_wavelength     0.71073
_diffrn_radiation_type           MoK\a
_diffrn_radiation_source         'fine-focus sealed tube'
_diffrn_radiation_monochromator  graphite
_diffrn_measurement_device_type  'Nonius Kappa-CCD'
_diffrn_measurement_method       '\f scans, and \w scans with \k offsets'
_diffrn_detector_area_resol_mean ?
_diffrn_reflns_number            20124
_diffrn_reflns_av_R_equivalents  0.0381
_diffrn_reflns_av_sigmaI/netI    0.0561
_diffrn_reflns_limit_h_min       -15
_diffrn_reflns_limit_h_max       14
_diffrn_reflns_limit_k_min       -17
_diffrn_reflns_limit_k_max       17
_diffrn_reflns_limit_l_min       -23
_diffrn_reflns_limit_l_max       23
_diffrn_reflns_theta_min         1.23
_diffrn_reflns_theta_max         27.65
_reflns_number_total             11232
_reflns_number_gt                8560
_reflns_threshold_expression     >2sigma(I)

_computing_data_collection       'COLLECT (Nonius, 1997-2001)'
_computing_cell_refinement       'DENZO-SMN (Otwinowski & Minor, 1997)'
_computing_data_reduction        DENZO-SMN
_computing_structure_solution    'SHELXS-97 (Sheldrick, 2008)'
_computing_structure_refinement  'SHELXL-97 (Sheldrick, 2008)'
_computing_molecular_graphics    'SHELXTL/PC (Sheldrick, 2001)'
_computing_publication_material  SHELXTL/PC

_refine_special_details          
; 
 Refinement of F^2^ against ALL reflections.  The weighted R-factor wR and 
 goodness of fit S are based on F^2^, conventional R-factors R are based 
 on F, with F set to zero for negative F^2^. The threshold expression of 
 F^2^ > 2sigma(F^2^) is used only for calculating R-factors(gt) etc. and is 
 not relevant to the choice of reflections for refinement.  R-factors based 
 on F^2^ are statistically about twice as large as those based on F, and R- 
 factors based on ALL data will be even larger. 
;

_refine_ls_structure_factor_coef Fsqd
_refine_ls_matrix_type           full
_refine_ls_weighting_scheme      calc
_refine_ls_weighting_details     
'calc w=1/[\s^2^(Fo^2^)+(0.1080P)^2^+0.0000P] where P=(Fo^2^+2Fc^2^)/3'
_atom_sites_solution_primary     direct
_atom_sites_solution_secondary   difmap
_atom_sites_solution_hydrogens   geom
_refine_ls_hydrogen_treatment    constr
_refine_ls_extinction_method     none
_refine_ls_extinction_coef       ?
_refine_ls_number_reflns         11232
_refine_ls_number_parameters     622
_refine_ls_number_restraints     0
_refine_ls_R_factor_all          0.0691
_refine_ls_R_factor_gt           0.0464
_refine_ls_wR_factor_ref         0.1621
_refine_ls_wR_factor_gt          0.1277
_refine_ls_goodness_of_fit_ref   1.057
_refine_ls_restrained_S_all      1.057
_refine_ls_shift/su_max          0.001
_refine_ls_shift/su_mean         0.000

loop_
_atom_site_label
_atom_site_type_symbol
_atom_site_fract_x
_atom_site_fract_y
_atom_site_fract_z
_atom_site_U_iso_or_equiv
_atom_site_adp_type
_atom_site_occupancy
_atom_site_symmetry_multiplicity
_atom_site_calc_flag
_atom_site_refinement_flags
_atom_site_disorder_assembly
_atom_site_disorder_group
Pt1 Pt 0.54255(3) 0.23669(2) 0.018730(17) 0.02269(10) Uani 1 1 d . . .
P1 P 0.60758(18) 0.27378(14) -0.08693(12) 0.0209(4) Uani 1 1 d . . .
N1 N 0.7313(6) 0.3456(5) 0.1156(4) 0.0253(13) Uani 1 1 d . . .
C1 C 0.3597(7) 0.1126(6) -0.0548(5) 0.0247(15) Uani 1 1 d . . .
Pt2 Pt 0.55796(3) 0.28292(2) -0.343306(17) 0.02538(10) Uani 1 1 d . . .
P2 P 0.41653(18) 0.19812(15) -0.28229(12) 0.0234(4) Uani 1 1 d . . .
N2 N 0.5294(6) 0.4280(5) -0.3527(4) 0.0283(14) Uani 1 1 d . . .
C2 C 0.2386(7) 0.1241(6) -0.0742(5) 0.0297(17) Uani 1 1 d . . .
H2A H 0.2416 0.1928 -0.0605 0.036 Uiso 1 1 calc R . .
C3 C 0.1145(8) 0.0336(6) -0.1137(5) 0.0359(19) Uani 1 1 d . . .
H3A H 0.0356 0.0428 -0.1254 0.043 Uiso 1 1 calc R . .
C4 C 0.1064(8) -0.0695(6) -0.1357(5) 0.0321(17) Uani 1 1 d . . .
C5 C -0.0305(8) -0.1704(7) -0.1745(6) 0.045(2) Uani 1 1 d . . .
H5A H -0.0163 -0.2344 -0.1855 0.068 Uiso 1 1 calc R . .
H5B H -0.0846 -0.1628 -0.2240 0.068 Uiso 1 1 calc R . .
H5C H -0.0761 -0.1769 -0.1383 0.068 Uiso 1 1 calc R . .
C6 C 0.2248(8) -0.0799(6) -0.1184(5) 0.0351(18) Uani 1 1 d . . .
H6A H 0.2213 -0.1485 -0.1337 0.042 Uiso 1 1 calc R . .
C7 C 0.3496(7) 0.0090(6) -0.0789(5) 0.0283(16) Uani 1 1 d . . .
H7A H 0.4277 -0.0012 -0.0685 0.034 Uiso 1 1 calc R . .
C8 C 0.5036(8) 0.1965(6) 0.1168(5) 0.0304(17) Uani 1 1 d . . .
C9 C 0.3836(9) 0.1248(6) 0.1203(6) 0.0370(19) Uani 1 1 d . . .
H9A H 0.3043 0.0937 0.0741 0.044 Uiso 1 1 calc R . .
C10 C 0.3821(10) 0.0998(7) 0.1916(6) 0.047(2) Uani 1 1 d . . .
H10A H 0.3004 0.0546 0.1928 0.056 Uiso 1 1 calc R . .
C11 C 0.4971(10) 0.1393(7) 0.2610(6) 0.046(2) Uani 1 1 d . . .
H11A H 0.4940 0.1167 0.3069 0.055 Uiso 1 1 calc R . .
C12 C 0.6189(10) 0.2140(7) 0.2619(6) 0.043(2) Uani 1 1 d . . .
H12A H 0.6974 0.2435 0.3085 0.051 Uiso 1 1 calc R . .
C13 C 0.6189(8) 0.2431(6) 0.1895(5) 0.0315(17) Uani 1 1 d . . .
C14 C 0.7416(8) 0.3222(6) 0.1879(5) 0.0305(17) Uani 1 1 d . . .
C15 C 0.8639(9) 0.3737(7) 0.2556(6) 0.042(2) Uani 1 1 d . . .
H15A H 0.8705 0.3587 0.3050 0.050 Uiso 1 1 calc R . .
C16 C 0.9765(9) 0.4484(7) 0.2465(5) 0.042(2) Uani 1 1 d . . .
H16A H 1.0598 0.4817 0.2898 0.051 Uiso 1 1 calc R . .
C17 C 0.9640(8) 0.4724(6) 0.1745(5) 0.037(2) Uani 1 1 d . . .
H17A H 1.0378 0.5229 0.1685 0.044 Uiso 1 1 calc R . .
C18 C 0.8409(7) 0.4209(6) 0.1111(5) 0.0294(16) Uani 1 1 d . . .
H18A H 0.8327 0.4390 0.0625 0.035 Uiso 1 1 calc R . .
C19 C 0.7670(7) 0.2625(5) -0.0682(4) 0.0225(15) Uani 1 1 d . . .
C20 C 0.7636(7) 0.1615(6) -0.0619(5) 0.0285(16) Uani 1 1 d . . .
H20A H 0.6826 0.1035 -0.0706 0.034 Uiso 1 1 calc R . .
C21 C 0.8810(7) 0.1473(6) -0.0425(5) 0.0320(18) Uani 1 1 d . . .
H21A H 0.8785 0.0797 -0.0382 0.038 Uiso 1 1 calc R . .
C22 C 1.0013(7) 0.2328(6) -0.0296(5) 0.0326(18) Uani 1 1 d . . .
H22A H 1.0796 0.2226 -0.0168 0.039 Uiso 1 1 calc R . .
C23 C 1.0060(7) 0.3324(6) -0.0356(5) 0.0296(16) Uani 1 1 d . . .
H23A H 1.0875 0.3901 -0.0264 0.036 Uiso 1 1 calc R . .
C24 C 0.8897(7) 0.3474(6) -0.0554(5) 0.0258(15) Uani 1 1 d . . .
H24A H 0.8933 0.4151 -0.0602 0.031 Uiso 1 1 calc R . .
C25 C 0.6418(7) 0.4112(6) -0.1021(4) 0.0239(15) Uani 1 1 d . . .
C26 C 0.6076(7) 0.4782(6) -0.0574(5) 0.0291(17) Uani 1 1 d . . .
H26A H 0.5728 0.4541 -0.0200 0.035 Uiso 1 1 calc R . .
C27 C 0.6252(7) 0.5809(6) -0.0687(5) 0.0297(17) Uani 1 1 d . . .
H27A H 0.5995 0.6244 -0.0403 0.036 Uiso 1 1 calc R . .
C28 C 0.6804(8) 0.6166(6) -0.1218(5) 0.0340(18) Uani 1 1 d . . .
H28A H 0.6917 0.6848 -0.1296 0.041 Uiso 1 1 calc R . .
C29 C 0.7196(7) 0.5543(6) -0.1640(5) 0.0290(16) Uani 1 1 d . . .
H29A H 0.7598 0.5809 -0.1988 0.035 Uiso 1 1 calc R . .
C30 C 0.6989(7) 0.4511(6) -0.1545(5) 0.0270(16) Uani 1 1 d . . .
H30A H 0.7238 0.4081 -0.1839 0.032 Uiso 1 1 calc R . .
C31 C 0.4958(7) 0.1707(6) -0.1862(4) 0.0254(15) Uani 1 1 d . . .
H31A H 0.5474 0.1329 -0.1969 0.030 Uiso 1 1 calc R . .
H31B H 0.4223 0.1180 -0.1771 0.030 Uiso 1 1 calc R . .
C32 C 0.2891(7) 0.0603(6) -0.3445(5) 0.0295(17) Uani 1 1 d . . .
C33 C 0.2136(8) -0.0129(6) -0.3125(5) 0.0341(18) Uani 1 1 d . . .
H33A H 0.2347 0.0030 -0.2573 0.041 Uiso 1 1 calc R . .
C34 C 0.1063(8) -0.1100(7) -0.3636(6) 0.038(2) Uani 1 1 d . . .
H34A H 0.0562 -0.1602 -0.3426 0.046 Uiso 1 1 calc R . .
C35 C 0.0744(8) -0.1316(7) -0.4450(6) 0.042(2) Uani 1 1 d . . .
H35A H 0.0015 -0.1962 -0.4789 0.050 Uiso 1 1 calc R . .
C36 C 0.1482(9) -0.0592(8) -0.4778(6) 0.046(2) Uani 1 1 d . . .
H36A H 0.1260 -0.0749 -0.5332 0.056 Uiso 1 1 calc R . .
C37 C 0.2558(8) 0.0371(7) -0.4267(5) 0.0361(19) Uani 1 1 d . . .
H37A H 0.3062 0.0866 -0.4480 0.043 Uiso 1 1 calc R . .
C38 C 0.2977(7) 0.2493(6) -0.2670(5) 0.0281(16) Uani 1 1 d . . .
C39 C 0.2990(7) 0.2882(6) -0.1937(5) 0.0296(17) Uani 1 1 d . . .
H39A H 0.3634 0.2892 -0.1469 0.036 Uiso 1 1 calc R . .
C40 C 0.2041(8) 0.3269(7) -0.1882(6) 0.042(2) Uani 1 1 d . . .
H40A H 0.2057 0.3534 -0.1380 0.050 Uiso 1 1 calc R . .
C41 C 0.1087(8) 0.3252(7) -0.2580(6) 0.043(2) Uani 1 1 d . . .
H41A H 0.0458 0.3508 -0.2552 0.052 Uiso 1 1 calc R . .
C42 C 0.1074(9) 0.2855(7) -0.3315(6) 0.043(2) Uani 1 1 d . . .
H42A H 0.0433 0.2843 -0.3785 0.052 Uiso 1 1 calc R . .
C43 C 0.1999(8) 0.2474(7) -0.3363(5) 0.041(2) Uani 1 1 d . . .
H43A H 0.1968 0.2199 -0.3867 0.050 Uiso 1 1 calc R . .
C44 C 0.4607(8) 0.4680(6) -0.3216(5) 0.0344(18) Uani 1 1 d . . .
H44A H 0.4131 0.4276 -0.2946 0.041 Uiso 1 1 calc R . .
C45 C 0.4572(9) 0.5658(7) -0.3278(6) 0.043(2) Uani 1 1 d . . .
H45A H 0.4081 0.5900 -0.3048 0.052 Uiso 1 1 calc R . .
C46 C 0.5250(9) 0.6282(7) -0.3672(6) 0.048(2) Uani 1 1 d . . .
H46A H 0.5211 0.6936 -0.3732 0.058 Uiso 1 1 calc R . .
C47 C 0.6001(8) 0.5893(7) -0.3980(6) 0.041(2) Uani 1 1 d . . .
C48 C 0.6001(8) 0.4893(6) -0.3908(5) 0.0340(18) Uani 1 1 d . . .
C49 C 0.6783(7) 0.4456(7) -0.4196(5) 0.0300(17) Uani 1 1 d . . .
C50 C 0.7542(8) 0.5022(7) -0.4611(6) 0.040(2) Uani 1 1 d . . .
C51 C 0.7515(13) 0.5976(11) -0.4705(9) 0.089(4) Uani 1 1 d . . .
H51A H 0.8022 0.6365 -0.4968 0.106 Uiso 1 1 calc R . .
C52 C 0.6740(13) 0.6422(11) -0.4418(8) 0.080(4) Uani 1 1 d . . .
H52A H 0.6726 0.7067 -0.4522 0.096 Uiso 1 1 calc R . .
C53 C 0.8249(9) 0.4558(9) -0.4916(7) 0.057(3) Uani 1 1 d . . .
H53A H 0.8716 0.4895 -0.5215 0.068 Uiso 1 1 calc R . .
C54 C 0.8239(9) 0.3597(9) -0.4763(6) 0.052(3) Uani 1 1 d . . .
H54A H 0.8741 0.3307 -0.4943 0.063 Uiso 1 1 calc R . .
C55 C 0.7494(9) 0.3034(8) -0.4343(6) 0.041(2) Uani 1 1 d . . .
H55A H 0.7496 0.2377 -0.4263 0.050 Uiso 1 1 calc R . .
C56 C 0.6754(7) 0.3458(7) -0.4049(5) 0.0304(17) Uani 1 1 d . . .
C57 C 0.6270(7) 0.1659(6) -0.3352(5) 0.0257(15) Uani 1 1 d . . .
C58 C 0.5707(8) 0.0670(7) -0.3929(5) 0.0338(18) Uani 1 1 d . . .
H58A H 0.4865 0.0453 -0.4339 0.041 Uiso 1 1 calc R . .
C59 C 0.6362(9) -0.0008(7) -0.3913(5) 0.0350(19) Uani 1 1 d . . .
H59A H 0.5958 -0.0655 -0.4318 0.042 Uiso 1 1 calc R . .
C60 C 0.7600(9) 0.0268(7) -0.3307(5) 0.0346(19) Uani 1 1 d . . .
C61 C 0.8310(11) -0.0456(8) -0.3311(6) 0.057(3) Uani 1 1 d . . .
H61A H 0.9151 -0.0145 -0.2850 0.085 Uiso 1 1 calc R . .
H61B H 0.8477 -0.0522 -0.3795 0.085 Uiso 1 1 calc R . .
H61C H 0.7753 -0.1164 -0.3290 0.085 Uiso 1 1 calc R . .
C62 C 0.8143(8) 0.1218(7) -0.2708(5) 0.0353(19) Uani 1 1 d . . .
H62A H 0.8965 0.1408 -0.2286 0.042 Uiso 1 1 calc R . .
C63 C 0.7506(8) 0.1902(6) -0.2710(5) 0.0310(17) Uani 1 1 d . . .
H63A H 0.7894 0.2526 -0.2287 0.037 Uiso 1 1 calc R . .

loop_
_atom_site_aniso_label
_atom_site_aniso_U_11
_atom_site_aniso_U_22
_atom_site_aniso_U_33
_atom_site_aniso_U_23
_atom_site_aniso_U_13
_atom_site_aniso_U_12
Pt1 0.02280(16) 0.01765(15) 0.03163(18) 0.00845(12) 0.01566(13) 0.00813(12)
P1 0.0188(8) 0.0181(8) 0.0280(10) 0.0078(7) 0.0122(7) 0.0073(7)
N1 0.019(3) 0.021(3) 0.031(3) 0.001(3) 0.010(3) 0.004(2)
C1 0.021(3) 0.022(3) 0.032(4) 0.008(3) 0.013(3) 0.007(3)
Pt2 0.02524(17) 0.02635(17) 0.02764(18) 0.00849(12) 0.01286(13) 0.01186(13)
P2 0.0221(9) 0.0244(9) 0.0261(10) 0.0066(8) 0.0113(8) 0.0111(8)
N2 0.030(3) 0.032(3) 0.027(3) 0.013(3) 0.010(3) 0.018(3)
C2 0.024(4) 0.027(4) 0.041(5) 0.008(3) 0.015(3) 0.013(3)
C3 0.023(4) 0.027(4) 0.052(5) 0.009(4) 0.014(4) 0.006(3)
C4 0.033(4) 0.027(4) 0.035(5) 0.012(3) 0.016(4) 0.009(3)
C5 0.036(5) 0.032(5) 0.051(6) 0.013(4) 0.012(4) 0.001(4)
C6 0.034(4) 0.024(4) 0.049(5) 0.011(4) 0.020(4) 0.011(3)
C7 0.029(4) 0.022(4) 0.035(4) 0.008(3) 0.015(3) 0.009(3)
C8 0.048(5) 0.025(4) 0.038(5) 0.015(3) 0.031(4) 0.021(4)
C9 0.041(5) 0.028(4) 0.052(5) 0.019(4) 0.033(4) 0.011(4)
C10 0.066(6) 0.031(4) 0.061(6) 0.018(4) 0.049(6) 0.016(4)
C11 0.065(6) 0.037(5) 0.042(6) 0.018(4) 0.034(5) 0.017(5)
C12 0.067(6) 0.033(5) 0.047(6) 0.020(4) 0.035(5) 0.028(4)
C13 0.046(5) 0.021(4) 0.036(5) 0.010(3) 0.025(4) 0.015(3)
C14 0.038(4) 0.025(4) 0.031(4) 0.007(3) 0.018(4) 0.013(3)
C15 0.047(5) 0.034(5) 0.039(5) 0.009(4) 0.010(4) 0.018(4)
C16 0.039(5) 0.040(5) 0.037(5) 0.001(4) 0.003(4) 0.019(4)
C17 0.026(4) 0.037(5) 0.038(5) 0.004(4) 0.014(4) 0.005(3)
C18 0.029(4) 0.031(4) 0.024(4) 0.005(3) 0.015(3) 0.007(3)
C19 0.032(4) 0.019(3) 0.021(4) 0.005(3) 0.013(3) 0.013(3)
C20 0.028(4) 0.020(4) 0.042(5) 0.014(3) 0.019(3) 0.009(3)
C21 0.024(4) 0.022(4) 0.048(5) 0.007(3) 0.013(4) 0.009(3)
C22 0.021(4) 0.029(4) 0.044(5) 0.002(3) 0.010(3) 0.012(3)
C23 0.025(4) 0.030(4) 0.034(4) 0.010(3) 0.012(3) 0.010(3)
C24 0.025(4) 0.026(4) 0.031(4) 0.008(3) 0.016(3) 0.012(3)
C25 0.021(3) 0.021(3) 0.032(4) 0.010(3) 0.010(3) 0.010(3)
C26 0.028(4) 0.025(4) 0.035(4) 0.005(3) 0.013(3) 0.012(3)
C27 0.026(4) 0.025(4) 0.040(5) 0.006(3) 0.012(3) 0.015(3)
C28 0.029(4) 0.021(4) 0.042(5) 0.010(3) 0.007(4) 0.006(3)
C29 0.025(4) 0.025(4) 0.034(4) 0.011(3) 0.009(3) 0.009(3)
C30 0.023(4) 0.027(4) 0.031(4) 0.010(3) 0.013(3) 0.009(3)
C31 0.025(4) 0.020(3) 0.028(4) 0.008(3) 0.009(3) 0.008(3)
C32 0.020(3) 0.033(4) 0.036(4) 0.003(3) 0.012(3) 0.012(3)
C33 0.038(4) 0.028(4) 0.028(4) 0.006(3) 0.008(4) 0.011(4)
C34 0.027(4) 0.028(4) 0.047(5) 0.006(4) 0.011(4) 0.002(3)
C35 0.037(5) 0.027(4) 0.044(5) -0.006(4) 0.008(4) 0.006(4)
C36 0.039(5) 0.051(6) 0.031(5) 0.000(4) 0.010(4) 0.007(4)
C37 0.026(4) 0.041(5) 0.033(5) 0.002(4) 0.011(3) 0.008(4)
C38 0.024(4) 0.023(4) 0.037(4) 0.004(3) 0.012(3) 0.010(3)
C39 0.026(4) 0.029(4) 0.031(4) 0.003(3) 0.012(3) 0.010(3)
C40 0.035(5) 0.043(5) 0.044(5) 0.000(4) 0.016(4) 0.019(4)
C41 0.034(5) 0.048(5) 0.055(6) 0.007(4) 0.020(4) 0.026(4)
C42 0.039(5) 0.049(5) 0.047(5) 0.013(4) 0.010(4) 0.031(4)
C43 0.042(5) 0.060(6) 0.033(5) 0.010(4) 0.012(4) 0.037(5)
C44 0.037(4) 0.033(4) 0.036(5) 0.010(4) 0.014(4) 0.018(4)
C45 0.056(6) 0.035(5) 0.047(6) 0.010(4) 0.016(5) 0.033(4)
C46 0.054(6) 0.029(5) 0.058(6) 0.014(4) 0.016(5) 0.019(4)
C47 0.035(4) 0.032(4) 0.046(5) 0.018(4) 0.007(4) 0.008(4)
C48 0.036(4) 0.027(4) 0.033(5) 0.013(3) 0.009(4) 0.010(3)
C49 0.020(4) 0.043(5) 0.026(4) 0.018(3) 0.007(3) 0.011(3)
C50 0.034(4) 0.040(5) 0.051(6) 0.027(4) 0.017(4) 0.014(4)
C51 0.067(8) 0.080(10) 0.105(12) 0.029(9) 0.031(8) 0.018(7)
C52 0.086(9) 0.068(8) 0.083(10) 0.036(7) 0.024(8) 0.032(7)
C53 0.043(5) 0.070(7) 0.079(8) 0.048(6) 0.037(6) 0.027(5)
C54 0.048(6) 0.072(7) 0.072(7) 0.044(6) 0.043(5) 0.039(5)
C55 0.039(5) 0.056(6) 0.054(6) 0.031(5) 0.034(4) 0.027(4)
C56 0.026(4) 0.041(4) 0.032(4) 0.020(4) 0.019(3) 0.013(3)
C57 0.021(3) 0.029(4) 0.031(4) 0.010(3) 0.014(3) 0.011(3)
C58 0.037(4) 0.042(5) 0.032(4) 0.013(4) 0.016(4) 0.024(4)
C59 0.051(5) 0.038(4) 0.031(4) 0.012(4) 0.028(4) 0.025(4)
C60 0.047(5) 0.044(5) 0.037(5) 0.024(4) 0.029(4) 0.030(4)
C61 0.073(7) 0.060(6) 0.062(7) 0.021(5) 0.031(6) 0.048(6)
C62 0.031(4) 0.040(5) 0.039(5) 0.016(4) 0.013(4) 0.020(4)
C63 0.035(4) 0.033(4) 0.028(4) 0.012(3) 0.006(3) 0.021(4)

_geom_special_details            
; 
 All esds (except the esd in the dihedral angle between two l.s. planes) 
 are estimated using the full covariance matrix.  The cell esds are taken 
 into account individually in the estimation of esds in distances, angles 
 and torsion angles; correlations between esds in cell parameters are only 
 used when they are defined by crystal symmetry.  An approximate (isotropic) 
 treatment of cell esds is used for estimating esds involving l.s. planes. 
;

loop_
_geom_bond_atom_site_label_1
_geom_bond_atom_site_label_2
_geom_bond_distance
_geom_bond_site_symmetry_2
_geom_bond_publ_flag
Pt1 C1 2.042(7) . ?
Pt1 C8 2.058(7) . ?
Pt1 N1 2.151(6) . ?
Pt1 P1 2.3191(19) . ?
P1 C19 1.838(7) . ?
P1 C25 1.849(7) . ?
P1 C31 1.865(7) . ?
N1 C18 1.344(9) . ?
N1 C14 1.367(10) . ?
C1 C7 1.386(10) . ?
C1 C2 1.406(9) . ?
Pt2 C57 2.039(7) . ?
Pt2 C56 2.046(7) . ?
Pt2 N2 2.149(6) . ?
Pt2 P2 2.309(2) . ?
P2 C38 1.837(7) . ?
P2 C32 1.843(8) . ?
P2 C31 1.848(7) . ?
N2 C44 1.337(9) . ?
N2 C48 1.359(10) . ?
C2 C3 1.393(10) . ?
C2 H2A 0.9300 . ?
C3 C4 1.381(11) . ?
C3 H3A 0.9300 . ?
C4 C6 1.372(11) . ?
C4 C5 1.539(11) . ?
C5 H5A 0.9600 . ?
C5 H5B 0.9600 . ?
C5 H5C 0.9600 . ?
C6 C7 1.387(10) . ?
C6 H6A 0.9300 . ?
C7 H7A 0.9300 . ?
C8 C9 1.404(10) . ?
C8 C13 1.409(12) . ?
C9 C10 1.383(12) . ?
C9 H9A 0.9300 . ?
C10 C11 1.375(13) . ?
C10 H10A 0.9300 . ?
C11 C12 1.399(12) . ?
C11 H11A 0.9300 . ?
C12 C13 1.418(11) . ?
C12 H12A 0.9300 . ?
C13 C14 1.449(10) . ?
C14 C15 1.401(12) . ?
C15 C16 1.405(12) . ?
C15 H15A 0.9300 . ?
C16 C17 1.360(12) . ?
C16 H16A 0.9300 . ?
C17 C18 1.371(11) . ?
C17 H17A 0.9300 . ?
C18 H18A 0.9300 . ?
C19 C20 1.388(9) . ?
C19 C24 1.392(10) . ?
C20 C21 1.386(10) . ?
C20 H20A 0.9300 . ?
C21 C22 1.377(10) . ?
C21 H21A 0.9300 . ?
C22 C23 1.364(10) . ?
C22 H22A 0.9300 . ?
C23 C24 1.379(10) . ?
C23 H23A 0.9300 . ?
C24 H24A 0.9300 . ?
C25 C30 1.380(10) . ?
C25 C26 1.397(10) . ?
C26 C27 1.395(10) . ?
C26 H26A 0.9300 . ?
C27 C28 1.363(11) . ?
C27 H27A 0.9300 . ?
C28 C29 1.369(11) . ?
C28 H28A 0.9300 . ?
C29 C30 1.385(10) . ?
C29 H29A 0.9300 . ?
C30 H30A 0.9300 . ?
C31 H31A 0.9700 . ?
C31 H31B 0.9700 . ?
C32 C37 1.382(11) . ?
C32 C33 1.388(11) . ?
C33 C34 1.390(11) . ?
C33 H33A 0.9300 . ?
C34 C35 1.368(12) . ?
C34 H34A 0.9300 . ?
C35 C36 1.384(13) . ?
C35 H35A 0.9300 . ?
C36 C37 1.384(11) . ?
C36 H36A 0.9300 . ?
C37 H37A 0.9300 . ?
C38 C39 1.366(10) . ?
C38 C43 1.389(11) . ?
C39 C40 1.411(10) . ?
C39 H39A 0.9300 . ?
C40 C41 1.382(13) . ?
C40 H40A 0.9300 . ?
C41 C42 1.372(12) . ?
C41 H41A 0.9300 . ?
C42 C43 1.375(10) . ?
C42 H42A 0.9300 . ?
C43 H43A 0.9300 . ?
C44 C45 1.372(10) . ?
C44 H44A 0.9300 . ?
C45 C46 1.369(13) . ?
C45 H45A 0.9300 . ?
C46 C47 1.391(12) . ?
C46 H46A 0.9300 . ?
C47 C48 1.392(11) . ?
C47 C52 1.416(15) . ?
C48 C49 1.442(11) . ?
C49 C56 1.414(11) . ?
C49 C50 1.415(11) . ?
C50 C51 1.348(16) . ?
C50 C53 1.404(13) . ?
C51 C52 1.443(18) . ?
C51 H51A 0.9300 . ?
C52 H52A 0.9300 . ?
C53 C54 1.374(13) . ?
C53 H53A 0.9300 . ?
C54 C55 1.411(12) . ?
C54 H54A 0.9300 . ?
C55 C56 1.394(11) . ?
C55 H55A 0.9300 . ?
C57 C58 1.390(10) . ?
C57 C63 1.419(10) . ?
C58 C59 1.398(10) . ?
C58 H58A 0.9300 . ?
C59 C60 1.382(12) . ?
C59 H59A 0.9300 . ?
C60 C62 1.376(12) . ?
C60 C61 1.505(11) . ?
C61 H61A 0.9600 . ?
C61 H61B 0.9600 . ?
C61 H61C 0.9600 . ?
C62 C63 1.390(10) . ?
C62 H62A 0.9300 . ?
C63 H63A 0.9300 . ?

loop_
_geom_angle_atom_site_label_1
_geom_angle_atom_site_label_2
_geom_angle_atom_site_label_3
_geom_angle
_geom_angle_site_symmetry_1
_geom_angle_site_symmetry_3
_geom_angle_publ_flag
C1 Pt1 C8 88.8(3) . . ?
C1 Pt1 N1 166.9(3) . . ?
C8 Pt1 N1 79.3(3) . . ?
C1 Pt1 P1 93.9(2) . . ?
C8 Pt1 P1 172.6(2) . . ?
N1 Pt1 P1 97.33(17) . . ?
C19 P1 C25 104.9(3) . . ?
C19 P1 C31 101.4(3) . . ?
C25 P1 C31 108.6(3) . . ?
C19 P1 Pt1 108.5(2) . . ?
C25 P1 Pt1 116.9(2) . . ?
C31 P1 Pt1 114.9(2) . . ?
C18 N1 C14 118.5(6) . . ?
C18 N1 Pt1 128.3(5) . . ?
C14 N1 Pt1 112.7(5) . . ?
C7 C1 C2 117.2(6) . . ?
C7 C1 Pt1 119.8(5) . . ?
C2 C1 Pt1 122.5(5) . . ?
C57 Pt2 C56 88.8(3) . . ?
C57 Pt2 N2 166.7(3) . . ?
C56 Pt2 N2 79.5(3) . . ?
C57 Pt2 P2 88.6(2) . . ?
C56 Pt2 P2 175.1(2) . . ?
N2 Pt2 P2 103.48(17) . . ?
C38 P2 C32 96.5(3) . . ?
C38 P2 C31 105.7(4) . . ?
C32 P2 C31 101.7(3) . . ?
C38 P2 Pt2 120.7(3) . . ?
C32 P2 Pt2 112.4(3) . . ?
C31 P2 Pt2 116.5(2) . . ?
C44 N2 C48 117.4(7) . . ?
C44 N2 Pt2 128.7(5) . . ?
C48 N2 Pt2 113.6(5) . . ?
C3 C2 C1 120.7(7) . . ?
C3 C2 H2A 119.6 . . ?
C1 C2 H2A 119.6 . . ?
C4 C3 C2 121.2(7) . . ?
C4 C3 H3A 119.4 . . ?
C2 C3 H3A 119.4 . . ?
C6 C4 C3 117.9(7) . . ?
C6 C4 C5 120.8(7) . . ?
C3 C4 C5 121.2(7) . . ?
C4 C5 H5A 109.5 . . ?
C4 C5 H5B 109.5 . . ?
H5A C5 H5B 109.5 . . ?
C4 C5 H5C 109.5 . . ?
H5A C5 H5C 109.5 . . ?
H5B C5 H5C 109.5 . . ?
C4 C6 C7 122.0(7) . . ?
C4 C6 H6A 119.0 . . ?
C7 C6 H6A 119.0 . . ?
C1 C7 C6 121.0(7) . . ?
C1 C7 H7A 119.5 . . ?
C6 C7 H7A 119.5 . . ?
C9 C8 C13 116.6(7) . . ?
C9 C8 Pt1 129.8(7) . . ?
C13 C8 Pt1 113.5(5) . . ?
C10 C9 C8 120.7(9) . . ?
C10 C9 H9A 119.6 . . ?
C8 C9 H9A 119.6 . . ?
C11 C10 C9 122.3(8) . . ?
C11 C10 H10A 118.8 . . ?
C9 C10 H10A 118.8 . . ?
C10 C11 C12 119.5(9) . . ?
C10 C11 H11A 120.3 . . ?
C12 C11 H11A 120.3 . . ?
C11 C12 C13 118.0(9) . . ?
C11 C12 H12A 121.0 . . ?
C13 C12 H12A 121.0 . . ?
C8 C13 C12 122.7(7) . . ?
C8 C13 C14 117.2(7) . . ?
C12 C13 C14 120.1(8) . . ?
N1 C14 C15 121.1(7) . . ?
N1 C14 C13 115.7(7) . . ?
C15 C14 C13 123.2(8) . . ?
C14 C15 C16 118.0(8) . . ?
C14 C15 H15A 121.0 . . ?
C16 C15 H15A 121.0 . . ?
C17 C16 C15 120.2(8) . . ?
C17 C16 H16A 119.9 . . ?
C15 C16 H16A 119.9 . . ?
C16 C17 C18 118.9(8) . . ?
C16 C17 H17A 120.5 . . ?
C18 C17 H17A 120.5 . . ?
N1 C18 C17 123.3(7) . . ?
N1 C18 H18A 118.4 . . ?
C17 C18 H18A 118.4 . . ?
C20 C19 C24 118.6(6) . . ?
C20 C19 P1 115.9(5) . . ?
C24 C19 P1 125.5(5) . . ?
C21 C20 C19 119.9(7) . . ?
C21 C20 H20A 120.0 . . ?
C19 C20 H20A 120.0 . . ?
C22 C21 C20 120.4(7) . . ?
C22 C21 H21A 119.8 . . ?
C20 C21 H21A 119.8 . . ?
C23 C22 C21 120.2(7) . . ?
C23 C22 H22A 119.9 . . ?
C21 C22 H22A 119.9 . . ?
C22 C23 C24 119.9(7) . . ?
C22 C23 H23A 120.0 . . ?
C24 C23 H23A 120.0 . . ?
C23 C24 C19 120.9(7) . . ?
C23 C24 H24A 119.5 . . ?
C19 C24 H24A 119.5 . . ?
C30 C25 C26 118.4(7) . . ?
C30 C25 P1 123.9(5) . . ?
C26 C25 P1 117.7(6) . . ?
C27 C26 C25 120.5(7) . . ?
C27 C26 H26A 119.8 . . ?
C25 C26 H26A 119.8 . . ?
C28 C27 C26 119.1(7) . . ?
C28 C27 H27A 120.4 . . ?
C26 C27 H27A 120.4 . . ?
C27 C28 C29 121.5(7) . . ?
C27 C28 H28A 119.2 . . ?
C29 C28 H28A 119.2 . . ?
C28 C29 C30 119.4(7) . . ?
C28 C29 H29A 120.3 . . ?
C30 C29 H29A 120.3 . . ?
C25 C30 C29 121.0(7) . . ?
C25 C30 H30A 119.5 . . ?
C29 C30 H30A 119.5 . . ?
P2 C31 P1 126.3(4) . . ?
P2 C31 H31A 105.7 . . ?
P1 C31 H31A 105.7 . . ?
P2 C31 H31B 105.7 . . ?
P1 C31 H31B 105.7 . . ?
H31A C31 H31B 106.2 . . ?
C37 C32 C33 119.9(7) . . ?
C37 C32 P2 118.0(6) . . ?
C33 C32 P2 121.4(6) . . ?
C32 C33 C34 119.5(8) . . ?
C32 C33 H33A 120.2 . . ?
C34 C33 H33A 120.2 . . ?
C35 C34 C33 119.8(8) . . ?
C35 C34 H34A 120.1 . . ?
C33 C34 H34A 120.1 . . ?
C34 C35 C36 121.4(8) . . ?
C34 C35 H35A 119.3 . . ?
C36 C35 H35A 119.3 . . ?
C35 C36 C37 118.7(8) . . ?
C35 C36 H36A 120.6 . . ?
C37 C36 H36A 120.6 . . ?
C32 C37 C36 120.6(8) . . ?
C32 C37 H37A 119.7 . . ?
C36 C37 H37A 119.7 . . ?
C39 C38 C43 118.7(7) . . ?
C39 C38 P2 125.1(6) . . ?
C43 C38 P2 116.2(6) . . ?
C38 C39 C40 120.9(8) . . ?
C38 C39 H39A 119.5 . . ?
C40 C39 H39A 119.5 . . ?
C41 C40 C39 119.3(8) . . ?
C41 C40 H40A 120.4 . . ?
C39 C40 H40A 120.4 . . ?
C42 C41 C40 119.5(7) . . ?
C42 C41 H41A 120.2 . . ?
C40 C41 H41A 120.2 . . ?
C41 C42 C43 120.8(8) . . ?
C41 C42 H42A 119.6 . . ?
C43 C42 H42A 119.6 . . ?
C42 C43 C38 120.8(8) . . ?
C42 C43 H43A 119.6 . . ?
C38 C43 H43A 119.6 . . ?
N2 C44 C45 123.1(8) . . ?
N2 C44 H44A 118.5 . . ?
C45 C44 H44A 118.5 . . ?
C46 C45 C44 120.8(8) . . ?
C46 C45 H45A 119.6 . . ?
C44 C45 H45A 119.6 . . ?
C45 C46 C47 116.9(8) . . ?
C45 C46 H46A 121.6 . . ?
C47 C46 H46A 121.6 . . ?
C46 C47 C48 120.3(8) . . ?
C46 C47 C52 124.3(9) . . ?
C48 C47 C52 115.3(9) . . ?
N2 C48 C47 121.5(8) . . ?
N2 C48 C49 115.4(7) . . ?
C47 C48 C49 123.1(8) . . ?
C56 C49 C50 122.3(7) . . ?
C56 C49 C48 117.7(7) . . ?
C50 C49 C48 120.0(7) . . ?
C51 C50 C53 123.7(10) . . ?
C51 C50 C49 117.3(10) . . ?
C53 C50 C49 119.0(8) . . ?
C50 C51 C52 123.2(13) . . ?
C50 C51 H51A 118.4 . . ?
C52 C51 H51A 118.4 . . ?
C47 C52 C51 121.0(12) . . ?
C47 C52 H52A 119.5 . . ?
C51 C52 H52A 119.5 . . ?
C54 C53 C50 118.7(8) . . ?
C54 C53 H53A 120.6 . . ?
C50 C53 H53A 120.6 . . ?
C53 C54 C55 122.4(8) . . ?
C53 C54 H54A 118.8 . . ?
C55 C54 H54A 118.8 . . ?
C56 C55 C54 120.4(8) . . ?
C56 C55 H55A 119.8 . . ?
C54 C55 H55A 119.8 . . ?
C55 C56 C49 117.1(7) . . ?
C55 C56 Pt2 129.2(6) . . ?
C49 C56 Pt2 113.7(5) . . ?
C58 C57 C63 115.9(7) . . ?
C58 C57 Pt2 125.1(6) . . ?
C63 C57 Pt2 118.6(5) . . ?
C57 C58 C59 122.2(7) . . ?
C57 C58 H58A 118.9 . . ?
C59 C58 H58A 118.9 . . ?
C60 C59 C58 121.0(8) . . ?
C60 C59 H59A 119.5 . . ?
C58 C59 H59A 119.5 . . ?
C62 C60 C59 117.6(7) . . ?
C62 C60 C61 122.0(8) . . ?
C59 C60 C61 120.4(8) . . ?
C60 C61 H61A 109.5 . . ?
C60 C61 H61B 109.5 . . ?
H61A C61 H61B 109.5 . . ?
C60 C61 H61C 109.5 . . ?
H61A C61 H61C 109.5 . . ?
H61B C61 H61C 109.5 . . ?
C60 C62 C63 122.2(8) . . ?
C60 C62 H62A 118.9 . . ?
C63 C62 H62A 118.9 . . ?
C62 C63 C57 120.8(7) . . ?
C62 C63 H63A 119.6 . . ?
C57 C63 H63A 119.6 . . ?

loop_
_geom_torsion_atom_site_label_1
_geom_torsion_atom_site_label_2
_geom_torsion_atom_site_label_3
_geom_torsion_atom_site_label_4
_geom_torsion
_geom_torsion_site_symmetry_1
_geom_torsion_site_symmetry_2
_geom_torsion_site_symmetry_3
_geom_torsion_site_symmetry_4
_geom_torsion_publ_flag
C1 Pt1 P1 C19 -123.0(3) . . . . ?
C8 Pt1 P1 C19 -12.4(18) . . . . ?
N1 Pt1 P1 C19 50.2(3) . . . . ?
C1 Pt1 P1 C25 118.8(3) . . . . ?
C8 Pt1 P1 C25 -130.6(18) . . . . ?
N1 Pt1 P1 C25 -68.1(3) . . . . ?
C1 Pt1 P1 C31 -10.4(3) . . . . ?
C8 Pt1 P1 C31 100.3(18) . . . . ?
N1 Pt1 P1 C31 162.8(3) . . . . ?
C1 Pt1 N1 C18 157.2(10) . . . . ?
C8 Pt1 N1 C18 -177.9(6) . . . . ?
P1 Pt1 N1 C18 8.8(6) . . . . ?
C1 Pt1 N1 C14 -13.9(13) . . . . ?
C8 Pt1 N1 C14 11.0(5) . . . . ?
P1 Pt1 N1 C14 -162.3(5) . . . . ?
C8 Pt1 C1 C7 -89.1(6) . . . . ?
N1 Pt1 C1 C7 -64.6(13) . . . . ?
P1 Pt1 C1 C7 84.0(6) . . . . ?
C8 Pt1 C1 C2 82.5(6) . . . . ?
N1 Pt1 C1 C2 107.0(11) . . . . ?
P1 Pt1 C1 C2 -104.4(6) . . . . ?
C57 Pt2 P2 C38 -177.1(4) . . . . ?
C56 Pt2 P2 C38 -119(3) . . . . ?
N2 Pt2 P2 C38 8.3(3) . . . . ?
C57 Pt2 P2 C32 -64.4(3) . . . . ?
C56 Pt2 P2 C32 -6(3) . . . . ?
N2 Pt2 P2 C32 121.1(3) . . . . ?
C57 Pt2 P2 C31 52.4(3) . . . . ?
C56 Pt2 P2 C31 110(3) . . . . ?
N2 Pt2 P2 C31 -122.2(3) . . . . ?
C57 Pt2 N2 C44 -147.7(11) . . . . ?
C56 Pt2 N2 C44 -176.0(7) . . . . ?
P2 Pt2 N2 C44 7.9(7) . . . . ?
C57 Pt2 N2 C48 27.1(14) . . . . ?
C56 Pt2 N2 C48 -1.3(6) . . . . ?
P2 Pt2 N2 C48 -177.3(5) . . . . ?
C7 C1 C2 C3 2.1(12) . . . . ?
Pt1 C1 C2 C3 -169.7(6) . . . . ?
C1 C2 C3 C4 -0.7(13) . . . . ?
C2 C3 C4 C6 -0.9(13) . . . . ?
C2 C3 C4 C5 176.2(8) . . . . ?
C3 C4 C6 C7 1.2(13) . . . . ?
C5 C4 C6 C7 -175.9(8) . . . . ?
C2 C1 C7 C6 -1.9(11) . . . . ?
Pt1 C1 C7 C6 170.1(6) . . . . ?
C4 C6 C7 C1 0.3(13) . . . . ?
C1 Pt1 C8 C9 -10.3(7) . . . . ?
N1 Pt1 C8 C9 175.2(7) . . . . ?
P1 Pt1 C8 C9 -121.2(17) . . . . ?
C1 Pt1 C8 C13 164.5(5) . . . . ?
N1 Pt1 C8 C13 -10.0(5) . . . . ?
P1 Pt1 C8 C13 54(2) . . . . ?
C13 C8 C9 C10 -1.9(11) . . . . ?
Pt1 C8 C9 C10 172.8(6) . . . . ?
C8 C9 C10 C11 -2.9(13) . . . . ?
C9 C10 C11 C12 4.8(13) . . . . ?
C10 C11 C12 C13 -2.0(12) . . . . ?
C9 C8 C13 C12 4.7(11) . . . . ?
Pt1 C8 C13 C12 -170.8(6) . . . . ?
C9 C8 C13 C14 -176.4(6) . . . . ?
Pt1 C8 C13 C14 8.1(8) . . . . ?
C11 C12 C13 C8 -2.9(11) . . . . ?
C11 C12 C13 C14 178.3(7) . . . . ?
C18 N1 C14 C15 -1.4(10) . . . . ?
Pt1 N1 C14 C15 170.7(6) . . . . ?
C18 N1 C14 C13 178.0(6) . . . . ?
Pt1 N1 C14 C13 -10.0(8) . . . . ?
C8 C13 C14 N1 1.6(10) . . . . ?
C12 C13 C14 N1 -179.5(7) . . . . ?
C8 C13 C14 C15 -179.1(7) . . . . ?
C12 C13 C14 C15 -0.2(11) . . . . ?
N1 C14 C15 C16 -1.2(11) . . . . ?
C13 C14 C15 C16 179.5(7) . . . . ?
C14 C15 C16 C17 2.5(12) . . . . ?
C15 C16 C17 C18 -1.2(12) . . . . ?
C14 N1 C18 C17 2.8(11) . . . . ?
Pt1 N1 C18 C17 -167.9(6) . . . . ?
C16 C17 C18 N1 -1.5(12) . . . . ?
C25 P1 C19 C20 -174.5(6) . . . . ?
C31 P1 C19 C20 -61.5(6) . . . . ?
Pt1 P1 C19 C20 59.8(6) . . . . ?
C25 P1 C19 C24 9.4(7) . . . . ?
C31 P1 C19 C24 122.4(7) . . . . ?
Pt1 P1 C19 C24 -116.2(6) . . . . ?
C24 C19 C20 C21 0.5(11) . . . . ?
P1 C19 C20 C21 -175.8(6) . . . . ?
C19 C20 C21 C22 -0.1(12) . . . . ?
C20 C21 C22 C23 0.1(13) . . . . ?
C21 C22 C23 C24 -0.5(12) . . . . ?
C22 C23 C24 C19 1.0(12) . . . . ?
C20 C19 C24 C23 -1.0(11) . . . . ?
P1 C19 C24 C23 175.0(6) . . . . ?
C19 P1 C25 C30 50.5(7) . . . . ?
C31 P1 C25 C30 -57.3(7) . . . . ?
Pt1 P1 C25 C30 170.7(5) . . . . ?
C19 P1 C25 C26 -129.5(6) . . . . ?
C31 P1 C25 C26 122.8(6) . . . . ?
Pt1 P1 C25 C26 -9.3(7) . . . . ?
C30 C25 C26 C27 2.9(11) . . . . ?
P1 C25 C26 C27 -177.1(6) . . . . ?
C25 C26 C27 C28 -2.2(12) . . . . ?
C26 C27 C28 C29 -0.4(12) . . . . ?
C27 C28 C29 C30 2.1(12) . . . . ?
C26 C25 C30 C29 -1.2(11) . . . . ?
P1 C25 C30 C29 178.8(6) . . . . ?
C28 C29 C30 C25 -1.3(11) . . . . ?
C38 P2 C31 P1 -65.1(5) . . . . ?
C32 P2 C31 P1 -165.4(5) . . . . ?
Pt2 P2 C31 P1 72.1(5) . . . . ?
C19 P1 C31 P2 -116.1(5) . . . . ?
C25 P1 C31 P2 -6.0(6) . . . . ?
Pt1 P1 C31 P2 127.1(4) . . . . ?
C38 P2 C32 C37 103.5(6) . . . . ?
C31 P2 C32 C37 -148.9(6) . . . . ?
Pt2 P2 C32 C37 -23.6(7) . . . . ?
C38 P2 C32 C33 -66.8(7) . . . . ?
C31 P2 C32 C33 40.8(7) . . . . ?
Pt2 P2 C32 C33 166.1(6) . . . . ?
C37 C32 C33 C34 1.1(12) . . . . ?
P2 C32 C33 C34 171.2(6) . . . . ?
C32 C33 C34 C35 -1.3(12) . . . . ?
C33 C34 C35 C36 1.0(13) . . . . ?
C34 C35 C36 C37 -0.5(14) . . . . ?
C33 C32 C37 C36 -0.6(12) . . . . ?
P2 C32 C37 C36 -171.0(7) . . . . ?
C35 C36 C37 C32 0.2(13) . . . . ?
C32 P2 C38 C39 121.3(7) . . . . ?
C31 P2 C38 C39 17.2(8) . . . . ?
Pt2 P2 C38 C39 -117.8(7) . . . . ?
C32 P2 C38 C43 -58.7(7) . . . . ?
C31 P2 C38 C43 -162.8(6) . . . . ?
Pt2 P2 C38 C43 62.2(7) . . . . ?
C43 C38 C39 C40 -0.7(12) . . . . ?
P2 C38 C39 C40 179.3(6) . . . . ?
C38 C39 C40 C41 0.0(13) . . . . ?
C39 C40 C41 C42 0.3(14) . . . . ?
C40 C41 C42 C43 0.0(15) . . . . ?
C41 C42 C43 C38 -0.7(15) . . . . ?
C39 C38 C43 C42 1.0(13) . . . . ?
P2 C38 C43 C42 -178.9(7) . . . . ?
C48 N2 C44 C45 1.1(12) . . . . ?
Pt2 N2 C44 C45 175.7(6) . . . . ?
N2 C44 C45 C46 0.3(14) . . . . ?
C44 C45 C46 C47 -2.0(14) . . . . ?
C45 C46 C47 C48 2.4(13) . . . . ?
C45 C46 C47 C52 178.7(10) . . . . ?
C44 N2 C48 C47 -0.7(12) . . . . ?
Pt2 N2 C48 C47 -176.1(6) . . . . ?
C44 N2 C48 C49 176.8(7) . . . . ?
Pt2 N2 C48 C49 1.4(9) . . . . ?
C46 C47 C48 N2 -1.1(13) . . . . ?
C52 C47 C48 N2 -177.7(9) . . . . ?
C46 C47 C48 C49 -178.4(8) . . . . ?
C52 C47 C48 C49 5.0(13) . . . . ?
N2 C48 C49 C56 -0.7(11) . . . . ?
C47 C48 C49 C56 176.7(8) . . . . ?
N2 C48 C49 C50 179.1(7) . . . . ?
C47 C48 C49 C50 -3.5(12) . . . . ?
C56 C49 C50 C51 -178.9(10) . . . . ?
C48 C49 C50 C51 1.3(14) . . . . ?
C56 C49 C50 C53 2.5(13) . . . . ?
C48 C49 C50 C53 -177.3(8) . . . . ?
C53 C50 C51 C52 177.4(12) . . . . ?
C49 C50 C51 C52 -1.2(18) . . . . ?
C46 C47 C52 C51 178.8(11) . . . . ?
C48 C47 C52 C51 -4.7(17) . . . . ?
C50 C51 C52 C47 3(2) . . . . ?
C51 C50 C53 C54 178.1(12) . . . . ?
C49 C50 C53 C54 -3.4(15) . . . . ?
C50 C53 C54 C55 3.0(17) . . . . ?
C53 C54 C55 C56 -1.5(16) . . . . ?
C54 C55 C56 C49 0.4(13) . . . . ?
C54 C55 C56 Pt2 179.5(7) . . . . ?
C50 C49 C56 C55 -1.0(12) . . . . ?
C48 C49 C56 C55 178.8(8) . . . . ?
C50 C49 C56 Pt2 179.8(6) . . . . ?
C48 C49 C56 Pt2 -0.4(9) . . . . ?
C57 Pt2 C56 C55 8.0(8) . . . . ?
N2 Pt2 C56 C55 -178.2(9) . . . . ?
P2 Pt2 C56 C55 -50(3) . . . . ?
C57 Pt2 C56 C49 -172.9(6) . . . . ?
N2 Pt2 C56 C49 0.8(6) . . . . ?
P2 Pt2 C56 C49 129(2) . . . . ?
C56 Pt2 C57 C58 -87.2(7) . . . . ?
N2 Pt2 C57 C58 -115.1(12) . . . . ?
P2 Pt2 C57 C58 88.6(6) . . . . ?
C56 Pt2 C57 C63 85.1(6) . . . . ?
N2 Pt2 C57 C63 57.3(14) . . . . ?
P2 Pt2 C57 C63 -99.0(6) . . . . ?
C63 C57 C58 C59 -4.6(11) . . . . ?
Pt2 C57 C58 C59 167.9(6) . . . . ?
C57 C58 C59 C60 1.4(12) . . . . ?
C58 C59 C60 C62 1.8(12) . . . . ?
C58 C59 C60 C61 -178.4(8) . . . . ?
C59 C60 C62 C63 -1.7(12) . . . . ?
C61 C60 C62 C63 178.6(8) . . . . ?
C60 C62 C63 C57 -1.7(12) . . . . ?
C58 C57 C63 C62 4.8(11) . . . . ?
Pt2 C57 C63 C62 -168.3(6) . . . . ?

_diffrn_measured_fraction_theta_max 0.985
_diffrn_reflns_theta_full        27.65
_diffrn_measured_fraction_theta_full 0.985
_refine_diff_density_max         3.400
_refine_diff_density_min         -3.335
_refine_diff_density_rms         0.391

#===END
